# Supplementary material
Source: PubMed Central journal article supplement (PMC5474792)
Supplement: pnas.1619434114.sapp.pdf [file pnas.1619434114.sapp.pdf]

## Campos, Zhao and Charlesworth

### SI Appendix

#### 1. Approximate BGS equations for a single gene without introns with no gene conversion

##### Effects of nonsynonymous sites without gene conversion.

First, consider the case with the same heterozygous selection coefficient  $t$  for each NS site. Let  $U$  be the deleterious haploid NS mutation rate for the gene in question ( $U = 0.667n_{ex}l_{ex}u$  with the model of nonsynonymous mutations in codons 1 and 2 alone described in the second section of the Materials and Methods), where  $u$  is the mean mutation rate per bp for the gene). Let  $P$  and  $Q$  be the fractions of the gene to the left and right, respectively, of a focal neutral site;  $M$  is the map length of the gene in Morgans, such that  $M = r_c n_{ex} l_{ex}$ . In the absence of gene conversion, Eq. 9 of (1) for a continuum of selected sites implies that the BGS effect for a neutral site at position  $P$  with selection coefficient  $t$  is:

$$E(P) \approx \frac{U(t + 2PQ\tilde{M})}{(2t + \tilde{M})} \left\{ \frac{1}{(t + P\tilde{M})} + \frac{1}{(t + Q\tilde{M})} \right\} \quad (\text{S1a})$$

where the tilde over  $M$  denotes  $M(1 - t)$ .

The mean value of  $E(P)$  for a gene is obtained by integrating Eq. S1A with respect to  $P$  over the interval  $(0, 1)$ , giving:

$$\bar{E} \approx \frac{U}{(2t + \tilde{M})} \int_0^1 (t + 2PQ\tilde{M}) \left\{ \frac{1}{(t + P\tilde{M})} + \frac{1}{(t + Q\tilde{M})} \right\} dP \quad (\text{S1b})$$

The first component of the right-hand side of this equation is equivalent to:

$$\frac{U}{(2t + \tilde{M})} \int_0^1 \frac{dP}{(t + P\tilde{M})} dP = \frac{2Ut}{(2t + \tilde{M})\tilde{M}} \left[ \ln\left(\frac{t + \tilde{M}}{t}\right) \right] \quad (\text{S2a})$$

The second component can be written as:

$$\frac{4U\tilde{M}}{(2t + \tilde{M})} \int_0^1 \frac{(P - P^2) dP}{(t + P\tilde{M})} \quad (\text{S2b})$$

We have:

$$\frac{4U\tilde{M}}{(2t+\tilde{M})} \int_0^1 \frac{P \, dP}{(t+P\tilde{M})} = \frac{4U}{(2t+\tilde{M})} \left[ 1 - \frac{t}{\tilde{M}} \ln\left(\frac{t+\tilde{M}}{t}\right) \right] \quad (\text{S3})$$

and

$$\frac{4U\tilde{M}}{(2t+\tilde{M})} \int_0^1 \frac{P^2 \, dP}{(t+P\tilde{M})} = \frac{4U}{(2t+\tilde{M})\tilde{M}} \left[ \frac{1}{2}(\tilde{M}-2t) + \frac{t^2}{\tilde{M}} \ln\left(\frac{t+\tilde{M}}{t}\right) \right] \quad (\text{S4})$$

Adding the separate terms together yields:

$$\bar{E} \approx \frac{2U}{\tilde{M}} \left\{ 1 - \frac{t}{\tilde{M}} \ln\left(\frac{t+\tilde{M}}{t}\right) \right\} \quad (\text{S5})$$

When  $M(1-t) < t$ , the logarithm can be expanded in powers of  $M(1-t)/t$ , so that the leading terms in mean  $E$  are given by:

$$\bar{E} \approx \frac{U}{t} \left( 1 - \frac{2\tilde{M}}{3t} \right) \quad (\text{S6})$$

When  $M(1-t) < t$ , this is a decreasing function of  $t$ , showing that BGS within a single gene can in principle generate a negative relation between the level of selective constraint on the gene and the level of synonymous site diversity.

**Approximate net effect of BGS due to nonsynonymous sites for a randomly placed neutral site in a gene without introns.** Let the gene be  $n_{\text{ex}}l_{\text{ex}}$  ( $> d_g$ ) basepairs in length. We consider the  $k$ th site counted from the right end of this sequence. The net effect of BGS contributed by the nonsynonymous sites to the right of this site can be written as:

$$E(k) = 0.667u \int_0^k \frac{t \, dx}{[t+r(x)(1-t)]^2} \quad (\text{S7})$$

where  $x$  represents distance in bp, approximated by a continuous line, and  $r(x)$  is the net rate of recombination over distance  $x$ , given by Eq. 2 of the Materials and Methods. Since this is an exponential function of  $x$ , the integral cannot be evaluated analytically.

A simple model of the effect of gene conversion is to approximate  $1 - \exp(-d_{ij}/d_g)$  by  $d_{ij}/d_g$ , which is accurate when  $d_{ij} \ll d_g$ . This implies that  $r_{ij}$  can be replaced by  $(r_c + g_c)d_{ij}$ , i.e. gene conversion behaves similarly to crossing over, so that  $M$  can be replaced with  $(r_c + g_c)n_{ex}l_{ex}$ . Alternatively, when  $d_{ij} \gg d_g$ , the exponent is negligible and the expected value of the rate of gene conversion from Eq. 2 is approximately  $g = d_g g_c$ . The product of this term and  $1 - t_i$  can simply be added to  $t_i$  in the denominator of the basic equation for the effect on BGS of a single selected site  $i$ , yielding  $E_i = u_i t_i / [t_i + (g + r_c d_{ij})(1 - t_i)]^2$ .

A better alternative to both of these methods is to use the first approximation when  $d_{ij} \leq d_g$  and the second approximation when  $d_{ij} > d_g$ ; this is the ‘mixed model’ of gene conversion:

$$\hat{r}(x) = \begin{cases} (r_c + g_c)x & \text{if } x \leq d_g \\ r_c x + g_c d_g & \text{otherwise} \end{cases} \quad (\text{S8})$$

In both cases, the effect of gene conversion is overestimated, so that the effect of BGS will be underestimated when this ‘mixed’ approximation is used. Applying these relations to Eq. S7, we obtain:

$$E(k) \approx 0.667ut \int_0^k \frac{dx}{[t + r(x)(1-t)]^2} = \begin{cases} \frac{0.667ut}{(1-t)(r_c + g_c)} \left[ \frac{1}{t} - \frac{1}{t + (r_c + g_c)(1-t)k} \right] & k \leq d_g \\ \frac{0.667u}{(1-t)(r_c + g_c)} - \frac{0.667ut}{(1-t)r_c} \frac{1}{t + [g_c d_g + r_c k](1-t)} + \frac{0.667utg_c}{(1-t)r_c(r_c + g_c)} \frac{1}{t + d_g(r_c + g_c)(1-t)} & k > d_g \end{cases} \quad (\text{S9})$$

We then integrate  $E(k)$  from  $k = 0$  to  $n_{ex}l_{ex}$ , which gives its mean over all  $k$  values:

$$\begin{aligned}
E(k) &\approx 0.667ut \int_0^{n_{ex}l_{ex}} E(k) dk \\
&= \frac{0.667un_{ex}l_{ex}}{(1-t)(r_c + g_c)} + \frac{0.667g_c(n_{ex}l_{ex} - d_g)ut}{[(1-t)r_c(r_c + g_c)][t + d_g(r_c + g_c)(1-t)]} \\
&\quad - \frac{0.667ut}{[(1-t)(r_c + g_c)]^2} \ln \left[ \frac{t + d_g(r_c + g_c)(1-t)}{t} \right] - \frac{0.667ut}{[(1-t)r_c]^2} \ln \left[ \frac{t + (r_c n_{ex}l_{ex} + g_c d_g)(1-t)}{t + (r_c d_g + g_c d_g)(1-t)} \right] \quad (S10a)
\end{aligned}$$

The same procedure can be applied to the effects of nonsynonymous sites to the right of the initial synonymous site, so that the final value is twice the above expression. To take the mean over all sites, we divide the final values by the total number of sites in the gene ( $n_{ex}l_{ex}$ ). Noting that the deleterious mutation rate for the gene is  $U = 0.667 n_{ex}l_{ex}u$ , after some manipulation this yields :

$$\begin{aligned}
\bar{E} &\approx \frac{2U}{\tilde{M}} \left\{ \frac{1}{(1+r)} + \frac{rt(1 - d_g r_c / M)}{(1+r)[t + d_g(r_c + g_c)(1-t)]} - \frac{t}{\tilde{M}(1+r)^2} \ln \left[ \frac{t + d_g(r_c + g_c)(1-t)}{t} \right] \right. \\
&\quad \left. - \frac{t}{\tilde{M}} \ln \left[ \frac{t + (g_c + M)(1-t)}{t + d_g(r_c + g_c)(1-t)} \right] \right\} \quad (S10b)
\end{aligned}$$

where  $r = g_c/r_c$ . When  $g_c = 0$ , this expression reduces to Eq. S5.

**Contribution of large effect mutations.** Data from quantitative genetics analysis of mutational effects on fitness suggest that there is a contribution of deleterious mutations with larger effects than those estimated using DFE-alpha, representing mutational events that are distinct from those included in the rate  $U$  (2). It is a reasonable approximation to assume a fixed selection coefficient  $t_l$  for such mutations. If the proportion of all mutations that have large effects is  $p_l$ , the mutation rate to large mutations is  $U_l = p_l U / (1 - p_l)$ . We can then replace  $U$  and  $t$  in Eq. S10b with  $U_l$  and  $t_l$ , and add the resulting terms to Eq. S10b. This addition was used in all the models, unless otherwise stated.

**Integral model of the effects of UTR sites in the absence of introns.** We now examine the effects of untranslated regions (UTRs) of a gene, which also exert BGS effects on its synonymous sites. Assume that the length of the 5' UTR is  $l_5$ , while the length of the 3' UTR is  $l_3$ . Let  $u_u$  and  $t_u$  be the mutation and selection parameters for UTRs, corresponding to  $u$  and  $t$  for nonsynonymous sites in the previous section. We

assume that all sites in UTRs can exert BGS effects, which maximises the effect of BGS. Using the same procedure as above, the BGS effect contributed by the 3' UTR for the  $l$ th site from the right-hand end of an exon is:

$$E_3(l) = \int_l^{l+l_3} \frac{u_u t_u}{[t_u + r(x)(1-t_u)]^2} dx$$

$$= \begin{cases} \frac{u_u t_u}{(1-t_u)(r_c + g_c)} \left[ \frac{1}{t_u + (r_c + g_c)(1-t_u)l} - \frac{1}{t_u + (r_c + g_c)(1-t_u)(l+l_3)} \right] & 0 \leq l < \max\{0, d_g - l_3\} \\ \frac{u_u t_u}{(1-t_u)(r_c + g_c)} \frac{1}{t_u + (r_c + g_c)(1-t_u)l} - \frac{u_u t_u}{(1-t_u)r_c} \frac{1}{t_u + [g_c d_g + r_c(l+l_3)](1-t_u)} & \max\{0, d_g - l_3\} \leq l < d_g \\ \frac{g_c u_u t_u}{(1-t_u)r_c(r_c + g_c)} \frac{1}{t_u + (r_c + g_c)(1-t_u)d_g} & \\ \frac{u_u t_u}{(1-t_u)r_c} \left\{ \frac{1}{t_u + [g_c d_g + r_c l](1-t_u)} - \frac{1}{t_u + [g_c d_g + r_c(l+l_3)](1-t_u)} \right\} & l \geq d_g \end{cases}$$

(S11a)

where the mixed model of gene conversion was used.

Integrating this expression over all synonymous sites, the total BGS effect due to a 3' UTR is:

$$E_3 = \int_0^{n_{ex} l_{ex}} E_3(l) dl$$

$$= \begin{cases} \frac{u_u t_u}{(1-t_u)^2 (r_c + g_c)^2} \ln \left[ \frac{t_u + (r_c + g_c) d_g (1-t_u)}{t_u} \right] - \frac{u_u t_u}{(1-t_u)^2 r_c^2} \ln \left\{ \frac{t_u + [g_c d_g + r_c (n_{ex} l_{ex} + l_3)](1-t_u)}{t_u + [g_c d_g + r_c l_3](1-t_u)} \right\} & d_g < l_3 \\ + \frac{u_u t_u}{(1-t_u)^2 r_c^2} \ln \left\{ \frac{t_u + [g_c d_g + r_c n_{ex} l_{ex}](1-t_u)}{t_u + (r_c + g_c) d_g (1-t_u)} \right\} + \frac{g_c u_u t_u}{(1-t_u)r_c(r_c + g_c)} \frac{d_g}{t_u + (r_c + g_c)(1-t_u)d_g} & \\ \frac{u_u t_u}{(1-t_u)^2 (r_c + g_c)^2} \ln \left[ \frac{t_u + (r_c + g_c) l_3 (1-t_u)}{t_u} \right] - \frac{u_u t_u}{(1-t_u)^2 r_c^2} \ln \left[ \frac{t_u + [g_c d_g + r_c (n_{ex} l_{ex} + l_3)](1-t_u)}{t_u + [g_c d_g + r_c d_g](1-t_u)} \right] & d_g \geq l_3 \\ + \frac{u_u t_u}{(1-t_u)^2 r_c^2} \ln \left\{ \frac{t_u + [g_c d_g + r_c n_{ex} l_{ex}](1-t_u)}{t_u + (r_c + g_c) d_g (1-t_u)} \right\} + \frac{g_c u_u t_u}{(1-t_u)r_c(r_c + g_c)} \frac{l_3}{t_u + (r_c + g_c)(1-t_u)d_g} & \end{cases}$$

(S11b)

A similar expression applies to the BGS effect of a 5' UTR, with 5 replacing 3.

If  $d_g > l_3, l_5$ , as is the case for *Drosophila*, the mean effect of BGS from the two UTRs on a synonymous site is given by:

$$\begin{aligned}
\frac{E_3 + E_5}{n_{ex}l_{ex}} &= \frac{U_u t_u}{(1-t_u)^2 (1+r)^2 M_{ex} (M_3 + M_5)} \ln \left\{ \frac{[t_u + M_3(1+r)(1-t_u)][t_u + M_5(1+r)(1-t_u)]}{t_u^2} \right\} \\
&- \frac{U_u t_u}{(1-t_u)^2 M_{ex} (M_3 + M_5)} \ln \left\{ \frac{[t_u + (g_c d_g + M_{ex} + M_3)(1-t_u)][t_u + (g_c d_g + M_{ex} + M_5)(1-t_u)]}{[t_u + (g_c d_g + M_{ex})(1-t_u)]^2} \right\} \\
&+ \frac{g_c U_u t_u}{(1-t_u)r_c(1+r)M_{ex}[t_u + (r_c + g_c)(1-t_u)d_g]}
\end{aligned} \tag{S12}$$

where the total mutation rate for UTRs is  $U_u = (l_3 + l_5)u_u$ , and the total map lengths for exons and UTRs are  $M_{ex} = r_c n_{ex} l_{ex}$ ,  $M_3 = r_c l_3$  and  $M_5 = r_c l_5$ .

## 2. Determining the distributions of selection coefficients

To predict BGS effects for an assigned pair of values of  $\beta$  and  $\omega_{na}$ , as was done to produce the results shown in Figure 2, we employed a modification of the approach of (3) and (4). This uses the level of non-adaptive NS divergence to obtain an estimate of the mean of the DFE, given a value of  $\beta$ . For this purpose, we used the formula of (5) as modified by (6) in their Eq. 23. This expression relates divergence due to the fixation of slightly deleterious mutations (relative to neutral divergence) to the parameters of a gamma distribution of  $t$ . Using this result, the mean of  $\gamma = 4N_e t$  is given by:

$$\ln(\gamma) \approx [(1 + \beta)\ln(\beta) + \ln[\zeta(1 + \beta) - \ln(\omega_{na})]] / \beta \tag{S13a}$$

where  $\zeta(1 + \beta)$  is Riemann's zeta function:

$$\zeta(1 + \beta) = \sum_{i=1}^{\infty} i^{-(1+\beta)} \tag{S13b}$$

This method was also employed when estimating BGS effects from the population genomic data, as described in the next section, because it was found to provide more stable distributions of the bootstrapped values of  $\gamma$  than the direct estimates of  $\gamma$  obtained from DFE-alpha, probably reflecting inaccuracies in numerical integration over the gamma distributions. In this case, estimates of the relevant parameters are needed for each bin of  $K_A$  values. As described in the Materials and Methods, the DFE-alpha program (7) provided estimates of the shape ( $\beta$ ) and scale parameters of a gamma

distribution for each bin, as well as estimates of  $\omega_a$  and  $\omega_{na}$ . The value of  $\gamma$  for a given bin was then calculated from  $\beta$  and  $\omega_{na}$ , using Eqs. S13.

For this purpose,  $K_S$  values were first corrected for the effect on divergence of selection on codon usage at synonymous sites, using the mean *Fop* value for each bin to estimate the  $R$  parameter in Eq. S22 in section 5 below, which predicts the ratio of  $K_S$  to the corresponding neutral value. We then divided each observed  $K_S$  value by  $R$ , which yields the value of the neutral divergence corresponding to  $K_S$ . Adjusted values of  $\omega_{na}$  for NS sites were obtained by multiplying the unadjusted values by  $R$ . A similarly adjusted estimate of the mean of  $K_S$  over all bins was used to determine the divergence time in Eqs. S17, which were used to estimate the substitution rates of selectively favorable NS and UTR mutations.

### 3. Integration of the BGS equations over the distribution of selection coefficients

In order to obtain estimates of the effects of BGS when there is a distribution of selection, numerical integration of the BGS equations over an assumed distribution of selection coefficients, for given values of the mutation and recombination parameters, was carried out. For the results shown in Figure 2, we assumed a gamma distribution of the scaled selection coefficient,  $\gamma = 4N_e t$ , with a fixed scale parameter  $\beta$ ; this has convenient properties and provides a good fit to the data from the Rwandan population of *D. melanogaster* (8). We used a set of fixed values of the non-adaptive divergence parameter  $\omega_{na}$ , and estimated the corresponding mean values of  $\gamma$  from each pair of  $\omega_{na}$  and  $\beta$  values by the method described in section 2 above

(Eqs. S13). For a given value for  $N_e$  ( $10^6$  for the *D. melanogaster* population considered here (9)), the probability density of  $t$  for a given pair of values of  $\beta$  and  $\omega_{na}$  was obtained from a gamma distribution.

We removed the portion of the distribution of  $t$  for which the scaled selection coefficient ( $\gamma = 4N_e t$ ) was less than a threshold value,  $\gamma_c$ , of order 1, since the standard BGS formula is an overestimate when mutations are so weakly selected that drift becomes important (1). The selection coefficient corresponding to  $\gamma_c$  is denoted by  $t_c$ . By comparing the simulation results in Table 2 of (1) to their Eq. 9, we found that removal of the portion of the gamma distribution below  $4N_e t = 5$  led to accurate predictions of the simulated effects of BGS in a finite population. We therefore used  $\gamma_c = 5$  for the BGS predictions described in this paper. Use of the more stringent  $\gamma_c = 1$  resulted in small quantitative differences to the results, with a slight strengthening of the net BGS effect.

This had little effect on the estimates of the parameters for positive selection, which were estimated as described below.

For the summation method, a value of  $t$  was drawn from the truncated distribution for each selected site  $i$  and applied to Eq. 1 of the Materials and Methods. The sum over  $i$  was then taken to get  $E_j$ , using an assumed value of the mutation rate per bp,  $u$ . This was done for all values of  $j$ , and the mean of  $E_j$  over all sites was then determined. This was repeated 500 times to obtain a mean value of  $E$ ,  $\bar{E}$ , for a synonymous site located at a random position in the gene. The BGS predictions using the integral approximation were obtained from the ‘mixed model’ of gene conversion, described by Eqs. S10b and S12 above, integrating over the assumed truncated gamma distributions for NS and UTR sites, respectively.

#### 4. The effects of selective sweeps on diversity

Consider first the spread of a favorable mutation at nonsynonymous site  $i$ , which arose in a haplotype carrying a particular allele at a neutral site  $j$ . Following (10), the net change in the frequency  $q_j$  of the neutral allele between the start and end of the sweep in a large population is given by:

$$\Delta q_j \approx (1 - q_{j0}) q_{i0}^{2r_{ij}/s} \int_{q_{i0}}^1 \left( \frac{[1 - q_{it}]}{q_{it}} \right)^{2r_{ij}/s} dq_{it} \quad (\text{S14a})$$

where  $q_{j,t}$  and  $q_{i,t}$  are the frequencies of the neutral and selectively favorable alleles, respectively in generation  $t$  after the initiation of the sweep;  $r_{ij}$  is the recombination frequency between the two sites, and  $s$  is the selection coefficient in favor of homozygotes for the beneficial allele (semidominance and weak selection are assumed). An elementary derivation of this and the following results is given in (11), pp.410-411.

Favorable mutations that arise on the alternative background with respect to the neutral locus contribute a change in allele frequency of the chosen allele at the neutral locus of:

$$\Delta \tilde{q}_j \approx -q_{j0} q_{i0}^{2r_{ij}/s} \int_{q_{i0}}^1 \left( \frac{[1 - q_{it}]}{q_{it}} \right)^{2r_{ij}/s} dq_{it} \quad (\text{S14b})$$

The probabilities of these two alternative events are  $q_{j0}$  and  $1 - q_{j0}$ , respectively.

The integral in Eqs. S14a and S14b is an incomplete beta function and cannot be



evaluated analytically, but it is approximately equal to one when  $r_{ij} \ll s$ , as is required for a significant effect of the sweep on site  $j$ . We show in section 6 below that this assumption is likely to yield accurate results for cases of biological interest. In order to correct for stochastic losses of mutations arising at initial frequencies of  $1/(2N)$ ,  $q_{i0}$  is equated to the ratio of  $1/(2N)$  to the fixation probability of the favorable allele,  $(N_e s/N)$ , giving  $q_{i0} = 1/(2N_e s)$  (12). These two assumptions give the change in allele frequency from Eq. S14a as:

$$\Delta q_j \approx (1 - q_{j0}) \gamma_a^{-2r_{ij}/s} \quad (\text{S14c})$$

where  $\gamma_a = 2N_e s$  is the scaled selection coefficient for the favorable allele (a factor of 2 not 4 is used, since  $s$  is the selection coefficient for homozygotes).

The expected reduction in diversity caused by a sweep, relative to the neutral values, can be obtained by averaging over the two possible allelic states at the neutral locus and using Eq. S14c. It is given by:

$$\frac{\Delta \pi}{\pi_0} \approx -\gamma_a^{-4r_{ij}/s} \quad (\text{S14d})$$

This equation can also be derived by arguments based on coalescent theory (13, 14). Note that an incorrect version was used by (15), which may affect their inferences concerning the strength of selection.

As noted in (16), if the reasonable assumption is made that the time over which the selectively favorable allele spreads to fixation is much shorter than the expected neutral pairwise coalescent time,  $2N_e$ , this relative change in diversity is equivalent to the probability that there was no recombination during the sweep, so that the neutral site experienced a reduction of coalescent time to zero, as opposed what happens when recombination events occurred during the sweep that allow neutral sites with a standard coalescent time to be introduced into haplotypes carrying the favorable allele.

Following (16) and subsequent authors, e.g. (14), if we consider recurrent sweeps occurring over all nonsynonymous sites in a gene, at a rate  $\nu_a$  per nonsynonymous site per generation, and assume that  $\nu_a$  is sufficiently small that each sweep exerts its effect independently of the others, the net probability of an effectively instantaneous coalescent event induced by selection at neutral site  $j$  is given by:

$$P_{caj} = \nu_a \sum_i \gamma_a^{-4r_{ij}/s} \quad (\text{S15a})$$

A similar expression can be written for the effects of selective sweeps in the UTRs, where for simplicity we assume that the 3' and 5' UTRs have the same selection coefficient, which may of course differ from that for nonsynonymous sites. We can simply replace  $\nu_a$  with a corresponding rate of sweeps per each UTR sites ( $\nu_u$ ), and  $\gamma_a$  with a scaled selection coefficient  $\gamma_u$ , yielding a rate of selectively induced coalescent events of:

$$P_{cu j} = \nu_u \sum_{i'} \gamma_u^{-4r'_{ij}/s'} \quad (\text{S15b})$$

where the primes denote UTR sites and their parameters.

Provided that  $P_{caj}$  and  $P_{cu j}$  are  $\ll 1$ , the selectively induced coalescent events and standard neutral coalescent events at site  $j$  can be regarded as competing exponential processes (16), with rates  $P_{csj} = P_{caj} + P_{cu j}$  and  $1/(2N_e)$ , respectively. The net rate of coalescence is then given by the sum of these terms. Taking the reciprocal of this rate, the expected pairwise coalescent time at site, relative to the neutral value in the absence of sweeps,  $2N_e$ , is given by:

$$\frac{T_j}{2N_e} = \frac{1}{1 + 2N_e P_{scj}} \quad (\text{S16a})$$

The effects of BGS can be included by assuming that it acts independently of sweeps, reducing the effective population size at site  $j$  from  $2N_e$  to  $2N_e B_j$ , where  $B_j$  is given by Eq. 1 of the Materials and Methods or one of the approximations in section 1 above (14, 17, 18). Eq. S16a can then be replaced with:

$$\frac{T_j}{2N_e} = \frac{1}{B_j^{-1} + 2N_e P_{scj}} \quad (\text{S16b})$$

Assuming the infinite sites model of neutral variability (19), the ratio of neutral diversity at a synonymous site  $j$  ( $\pi_j$ ) to its expected value in the absence of selection ( $\pi_0$ ) is thus given by:

$$\frac{\pi_j}{\pi_0} = \frac{1}{B_j^{-1} + 2N_e P_{scj}} \quad (\text{S16c})$$

For a two-species comparison, we can write  $v_a$  and  $v_u$  in equations (S15a) and (S15b) as:

$$v_a = \alpha_a K_A / (2t_{div}) \quad (\text{S17a})$$

$$v_u = \alpha_u K_U / (2t_{div}) \quad (\text{S17b})$$

where  $t_{div}$  is the divergence time between the two species being compared,  $K_A$  and  $K_U$  are the nonsynonymous site and UTR site divergences, and  $\alpha_a$  and  $\alpha_u$  are the corresponding proportions of mutations fixed by positive selection. For substitutions along a single lineage, the factor of 2 is omitted.

Under neutrality,  $2ut_{div} = K_S$  for a two species comparison, and  $ut_{div} = K_S$  for a single lineage, so that  $t_{div}$  can be estimated from estimates of  $u$  and  $K_S$  (a correction for the effect on  $K_S$  of selection on codon usage is described in section 5 below). Under the infinite sites model, neutral nucleotide site diversity is proportional to the coalescent time, so that Eq. S16c can be rearranged to give the deviation between the predicted and observed values of the negative of the logarithm of the ratio of synonymous diversity to its value in the absence of selection. For the two-species comparison, we have:

$$dev_j = -\ln\left(\frac{\pi}{\pi_0}\right) + \ln\left(\frac{1}{B_j^{-1} + \alpha_a K_A (2t_c)^{-1} \sum_i \gamma_a^{-4r_{ij}/s} + \alpha_u K_U (2t_c)^{-1} \sum_{i'} \gamma_u^{-4r_{i'j}/s'}}\right) \quad (\text{S18})$$

where  $t_c$  is the divergence time in coalescent time units ( $t_c = t_{div}/2N_e$ ) for the two-species comparison. For a single lineage, the factor of 2 before  $t_c$  is omitted.

If we assume that sweeps originate from single new mutations, we can use the standard expression for the rate of substitution of mutations (20) to write  $v_a = up_a \gamma_a$  and  $v_u = up_u \gamma_u$  where  $p_a$  is the proportion of new nonsynonymous mutations that are positively selected, and  $u$  is the mutation rate per basepair. Using Eqs. S17, we can then estimate  $p_a$  and  $p_u$  from the relations:

$$p_a = \alpha_a K_A / (K_S \gamma_a) \quad (\text{S19a})$$

$$p_u = \alpha_u K_U / (K_S \gamma_u) \quad (\text{S19b})$$

In order to apply Eq. S18, it is necessary to eliminate  $\pi_0$ , the (unknown) diversity in the absence of selection. This was done by adding the smoothed value of  $-\ln(\pi_S/\pi_0)$  for the first bin in the set (given by the linear regression of  $-\ln(\pi_S/\pi_0)$  on  $K_A$ ) to each of the  $dev_j$  values for the other bins, so that the terms in  $\ln(\pi_0)$  cancel out. The sum of squares ( $SSD$ ) of the resulting quantities was used as a measure of goodness of fit. A 3-dimensional grid search was performed across a defined range of values of  $\gamma_u$  and of the intercept and slope for  $\gamma_a$ , in order to obtain estimates that minimise  $SSD$ . For the point estimates of the parameters, we normally used a grid of 9 values for each variable, with three iterations of the search over successively narrower intervals. The resulting values of  $\gamma_a$  and  $\gamma_u$  were then used in Eqs. S19 to obtain estimates of  $p_a$  and  $p_u$ , the proportions of NS and UTR mutations that are advantageous. An estimate of  $\pi_S/\pi_0$  for a bin was then obtained by substituting the parameter estimates for the bin into the right-hand side of Eq. S16c, providing a measure of the effect of selection at linked sites on synonymous site diversity. We also examined the effect of ignoring UTRs, by conducting similar analyses in which only NS sites were considered; in this case, only a two-dimensional grid search was needed.

We obtained estimates of  $\ln(\pi_0)$  by using the fact that the predicted value of  $-\ln(\pi_S)$  for the first bin in the set is equal to the sum of  $\ln(\pi_0)$  and the value of  $\ln(\pi_S/\pi_0)$  for the first bin predicted from Eq. S16c, denoted by  $P_1$  (this bin is expected to have little or no effect of selective sweeps at NS sites). It follows that  $\ln(\pi_0)$  can be estimated as the sum of  $P_1$  and the observed value of  $\ln(\pi_S)$  for the first bin. The predicted value of  $-\ln(\pi_S)$  for any bin other than the first can then be obtained by subtracting this estimate of  $\ln(\pi_0)$  from the estimate of  $-\ln(\pi_S/\pi_0)$  for the bin in question. The goodness of fit of the parameter estimates was assessed by calculating the Pearson correlation between observed and predicted values across bins (omitting the first bin).

## 5. Correcting for the effect on $K_S$ of weak selection at synonymous sites

We use the standard Li-Bulmer model of selection on codon usage, assuming a scaled selection coefficient  $\gamma$  for a given gene and a mutational bias  $\kappa$ , given by the ratio of the mutation rate from unpreferred to preferred codons to the mutation rate  $u$  in the reverse direction (see (11), pp. 274-275 for a description of this model). We assume that the base composition of synonymous sites is at the equilibrium value,  $x^*$ , given by the Li-Bulmer equation, such that the proportion of sites with preferred codons is equal to:

$$x^* = 1/[1 + \kappa \exp(-\gamma)] \quad (\text{S20})$$

If a value of  $\kappa$  is assumed,  $\gamma$  can be estimated from the observed proportion of preferred codons ( $Fop$ ) in a gene or set of genes by equating  $x^*$  to  $Fop$ .

The equilibrium value of the rate of substitution for sites subject to such selection is given by:

$$\lambda_s^* = 2\gamma\kappa u / [1 + \kappa \exp(-\gamma)][\exp(\gamma) - 1] \quad (\text{S21a})$$

(See (11), Eq. 6.11.)

The corresponding value for neutral sites with the same base composition, taking into account mutations in both directions, is:

$$\lambda_n^* = \kappa u [1 + \exp(-\gamma)] / [1 + \kappa \exp(-\gamma)] \quad (\text{S21b})$$

The ratio of the selected to neutral substitution rates is thus:

$$R = 2\gamma / [1 + \exp(-\gamma)][\exp(\gamma) - 1] \quad (\text{S22})$$

Estimates of  $t_{div}$  obtained using the neutral expectation for  $K_S$  should thus be divided by  $R$ . For the *mel-yak* data, the mean correction was 0.921 and the adjusted value of  $t_{div}$  was  $3.39 \times 10^7$  generations; for *mel*, the corresponding values were 0.920 and  $1.32 \times 10^7$  generations. These yield estimates of the mean rates of adaptive substitutions ( $v_a$ ) for NS sites of  $3.21 \times 10^{-10}$  and  $2.96 \times 10^{-10}$  for *mel-yak* and *mel*, respectively. The corresponding rates for UTR substitutions ( $v_u$ ) were  $8.16 \times 10^{-10}$  and  $8.78 \times 10^{-10}$ .

## 6. Approximating the incomplete beta function

The expected change in diversity over the two possible trajectories described by Eqs. S14a and S14b, using the approximation  $q_{i0} = 1/\gamma_a$ , is :

$$\frac{\Delta\pi}{\pi_0} \approx -\gamma_a^{-4r_{ij}/s} S_i^2 \quad (\text{S23a})$$

where  $S_i$  is the incomplete beta function:

$$S_i = \int_{q_{i0}}^1 \left( \frac{[1 - q_{it}]}{q_{it}} \right)^{2r_{ij}/s} dq_{it} \quad (\text{S23b})$$

This leads to the following generalisation of Eq. S14d:

$$P_{caj} \approx v_a \sum_i \gamma_a^{-4r_{ij}/s} S_i^2 \quad (\text{S24})$$

In the main text, we presented results that assume that  $S_i$  can be replaced with 1 without great loss of accuracy. We investigated the validity of this assumption by replacing  $S_i$  with 1 in Eq. S24, using the ‘standard’ gene model with 5 exons of 300 basepairs separated by 4 introns 100bp in length, and comparing the results with those obtained from Eqs. S23. The results are shown in Figure S8, where  $S_1$  in the caption refers to the exact value of the mean of the sum in Eq. S24 over all synonymous sites, and  $S_2$  to the value when  $S_i=1$ , for a range of values of  $\gamma_a$ . It is clear that the agreement is very close.

## References

1. Nordborg M, Charlesworth B, & Charlesworth D (1996) The effect of recombination on background selection. *Genet Res* 67:159-174.
2. Charlesworth B (2015) Causes of natural variation in fitness: evidence from studies of *Drosophila* populations. *Proc Natl Acad Sci USA* 12:1662-1669.
3. Mank JE, Vicoso B, Berlin S, & Charlesworth B (2009) Effective population size and the faster-X effect: empirical results and their interpretation. *Evolution* 64:663-674.
4. Hadrill PR, Loewe L, & Charlesworth B (2010) Estimating the parameters of selection on nonsynonymous mutations in *Drosophila pseudoobscura* and *D. miranda*. *Genetics* 185:1381-1396.
5. Kimura M (1979) Model of effectively neutral mutations in which selective constraint is incorporated. *Proc Natl Acad Sci USA* 76:3440-3444.
6. Welch JJ, Eyre-Walker A, & Waxman D (2008) *J Mol Evol* 67:418-426.
7. Eyre-Walker A & Keightley PD (2009) Estimating the rate of adaptive mutations in the presence of slightly deleterious mutations and population size change. *Mol Biol Evol* 26:2097-2108.
8. Kousathanas A & Keightley PD (2013) A comparison of models to infer the distribution of fitness effects of new mutations. *Genetics* 193:1197-1208.
9. Campos JL, Halligan DL, Hadrill PR, & Charlesworth B (2014) The relationship between recombination rate and patterns of molecular evolution and variation in *Drosophila melanogaster*. *Mol Biol Evol* 31:1010-1028.
10. Barton NH (2000) Genetic hitchhiking. *Phil Trans R Soc B* 355:1553-1562.
11. Charlesworth B & Charlesworth D (2010) *Elements of Evolutionary Genetics* (Roberts and Company, Greenwood Village, CO).
12. Maynard Smith J (1971) What use is sex? *JTB* 30:319-355.
13. Weissman DB & Barton NH (2012) Limits to the rate of adaptive substitution in sexual populations. *PLoS Genetics* 8:e1002740.

14. Elyashiv E, *et al.* (2016) A genomic map of the effects of linked selection in *Drosophila*. *PLoS Genetics* 12:e1006130.
15. Sattah S, Elyashiv E, Kolodny O, Rinott Y, & Sella G (2011) Pervasive adaptive protein evolution apparent in diversity patterns around amino acid substitutions in *Drosophila simulans*. *PLoS Genetics* 7:e1001302.
16. Wiehe THE & Stephan W (1993) Analysis of a genetic hitchhiking model and its application to DNA polymorphism data. *Mol Biol Evol* 10:842-854.
17. Kim Y & Stephan W (2000) Joint effects of genetic hitchhiking and background selection on neutral variation. *Genetics* 155:1415-1427.
18. Corbett-Detig RB, Hartl DL, & Sackton TB (2015) Natural selection constrains neutral diversity across a wide range of species. *PLoS Biology* 13:e1002112.
19. Kimura M (1971) Theoretical foundations of population genetics at the molecular level. *Theor Pop Biol* 2:174-208.
20. Kimura M & Ohta T (1971) *Theoretical Aspects of Population Genetics* (Princeton University Press, Princeton, N.J.).

## 7. SI Tables

**Table S1A. Multiple linear regression coefficients for  $\pi_S$  for *mel* – *yak***

| Variable   | Coefficient            | <i>P</i>              |
|------------|------------------------|-----------------------|
| Intercept  | $-3.28 \times 10^{-3}$ | 0.003782              |
| $K_S$      | $2.81 \times 10^{-2}$  | $< 2 \times 10^{-16}$ |
| Rec.       | $8.39 \times 10^{-3}$  | $< 2 \times 10^{-16}$ |
| Expression | $-5.22 \times 10^{-4}$ | $< 2 \times 10^{-16}$ |
| $K_A$      | $-5.02 \times 10^{-2}$ | $< 2 \times 10^{-16}$ |
| CDS length | $8.36 \times 10^{-7}$  | 0.000304              |
| GC content | $-3.97 \times 10^{-3}$ | 0.000567              |
| Fop        | $1.59 \times 10^{-2}$  | $< 2 \times 10^{-16}$ |

**Table S1B. Multiple linear regression coefficients for  $\pi_S$  for *mel***

| Variable   | Coefficient            | <i>P</i>               |
|------------|------------------------|------------------------|
| Intercept  | $-1.40 \times 10^{-3}$ | 0.22856                |
| $K_S$      | $1.08 \times 10^{-1}$  | $< 2 \times 10^{-16}$  |
| Rec.       | $8.50 \times 10^{-3}$  | $< 2 \times 10^{-16}$  |
| Expression | $-5.86 \times 10^{-4}$ | $< 2 \times 10^{-16}$  |
| $K_A$      | $-1.95 \times 10^{-1}$ | $6.33 \times 10^{-15}$ |
| CDS length | $5.24 \times 10^{-7}$  | 0.05735                |
| GC content | $-3.97 \times 10^{-3}$ | 0.00264                |
| Fop        | $1.56 \times 10^{-2}$  | $1.13 \times 10^{-15}$ |

$K_S$ , synonymous divergence; Rec., effective rate of crossing over; Expression, gene expression level across all developmental stages of *D. melanogaster*;  $K_A$ , nonsynonymous divergence; Fop, frequency of optimal codons in a gene; *P*, *P* value of a *t*-test. See the first section of the Materials and Methods for details of the data and variables used here.



**Table S2A Population genomic statistics for NS sites for each bin of  $K_A$  values for *mel-yak***

| Bin | $N$ | $K_A$  | $\pi_S$ | $\beta$ | $\omega_a$ | $\omega_{na}$ | Rec.  | CDS length | $\alpha \times K_A$ | $Fop$ |
|-----|-----|--------|---------|---------|------------|---------------|-------|------------|---------------------|-------|
| 1   | 122 | 0.0019 | 0.0130  | 0.657   | 0.0047     | 0.0049        | 1.128 | 529.1      | 0.0009              | 0.594 |
| 2   | 190 | 0.0031 | 0.0153  | 0.565   | 0.0069     | 0.0089        | 1.151 | 453.7      | 0.0014              | 0.585 |
| 3   | 174 | 0.0044 | 0.0153  | 0.537   | 0.0092     | 0.0107        | 1.185 | 545.3      | 0.0021              | 0.569 |
| 4   | 203 | 0.0056 | 0.0149  | 0.485   | 0.0109     | 0.0143        | 1.172 | 526.6      | 0.0025              | 0.562 |
| 5   | 189 | 0.0068 | 0.0157  | 0.507   | 0.0157     | 0.0153        | 1.249 | 531.1      | 0.0035              | 0.567 |
| 6   | 221 | 0.0081 | 0.0161  | 0.433   | 0.0166     | 0.0191        | 1.217 | 647.4      | 0.0038              | 0.552 |
| 7   | 192 | 0.0093 | 0.0154  | 0.492   | 0.0196     | 0.0210        | 1.181 | 549.8      | 0.0045              | 0.544 |
| 8   | 205 | 0.0106 | 0.0141  | 0.499   | 0.0239     | 0.0207        | 1.115 | 575.1      | 0.0057              | 0.545 |
| 9   | 185 | 0.0119 | 0.0155  | 0.409   | 0.0237     | 0.0260        | 1.210 | 634.5      | 0.0057              | 0.549 |
| 10  | 208 | 0.0131 | 0.0161  | 0.481   | 0.0303     | 0.0256        | 1.169 | 578.9      | 0.0071              | 0.541 |
| 11  | 181 | 0.0144 | 0.0158  | 0.511   | 0.0331     | 0.0255        | 1.162 | 615.8      | 0.0081              | 0.534 |
| 12  | 208 | 0.0156 | 0.0154  | 0.417   | 0.0310     | 0.0343        | 1.157 | 560.4      | 0.0074              | 0.537 |
| 13  | 164 | 0.0169 | 0.0152  | 0.436   | 0.0357     | 0.0342        | 1.204 | 640.1      | 0.0087              | 0.531 |
| 14  | 186 | 0.0181 | 0.0151  | 0.437   | 0.0383     | 0.0353        | 1.190 | 645.2      | 0.0094              | 0.522 |
| 15  | 161 | 0.0193 | 0.0151  | 0.423   | 0.0371     | 0.0407        | 1.162 | 541.5      | 0.0092              | 0.535 |
| 16  | 174 | 0.0206 | 0.0148  | 0.426   | 0.0346     | 0.0460        | 1.169 | 563.9      | 0.0088              | 0.518 |
| 17  | 146 | 0.0219 | 0.0151  | 0.465   | 0.0496     | 0.0367        | 1.207 | 619.9      | 0.0125              | 0.526 |
| 18  | 150 | 0.0231 | 0.0133  | 0.408   | 0.0446     | 0.0438        | 1.080 | 591.7      | 0.0115              | 0.517 |
| 19  | 134 | 0.0243 | 0.0146  | 0.421   | 0.0426     | 0.0506        | 1.090 | 513.1      | 0.0111              | 0.525 |
| 20  | 145 | 0.0256 | 0.0143  | 0.361   | 0.0496     | 0.0484        | 1.113 | 537.4      | 0.0129              | 0.514 |
| 21  | 127 | 0.0268 | 0.0165  | 0.373   | 0.0574     | 0.0486        | 1.128 | 635.0      | 0.0144              | 0.516 |
| 22  | 126 | 0.0282 | 0.0124  | 0.325   | 0.0317     | 0.0720        | 1.046 | 592.1      | 0.0086              | 0.504 |
| 23  | 102 | 0.0293 | 0.0149  | 0.316   | 0.0496     | 0.0636        | 1.102 | 538.4      | 0.0130              | 0.523 |
| 24  | 119 | 0.0305 | 0.0138  | 0.363   | 0.0537     | 0.0613        | 1.203 | 491.4      | 0.0142              | 0.508 |
| 25  | 90  | 0.0318 | 0.0141  | 0.284   | 0.0461     | 0.0717        | 1.082 | 614.1      | 0.0127              | 0.505 |
| 26  | 96  | 0.0331 | 0.0150  | 0.291   | 0.0575     | 0.0690        | 1.150 | 508.5      | 0.0149              | 0.507 |
| 27  | 78  | 0.0344 | 0.0143  | 0.316   | 0.0482     | 0.0765        | 1.126 | 520.4      | 0.0130              | 0.504 |
| 28  | 66  | 0.0355 | 0.0161  | 0.354   | 0.0576     | 0.0701        | 1.215 | 515.4      | 0.0160              | 0.506 |
| 29  | 125 | 0.0370 | 0.0130  | 0.332   | 0.0638     | 0.0722        | 1.114 | 512.7      | 0.0174              | 0.499 |
| 30  | 117 | 0.0389 | 0.0129  | 0.240   | 0.0582     | 0.0827        | 1.116 | 471.6      | 0.0161              | 0.496 |
| 31  | 124 | 0.0409 | 0.0132  | 0.324   | 0.0659     | 0.0820        | 1.053 | 442.8      | 0.0183              | 0.497 |
| 32  | 109 | 0.0430 | 0.0145  | 0.278   | 0.0570     | 0.0920        | 1.119 | 492.5      | 0.0164              | 0.500 |
| 33  | 102 | 0.0449 | 0.0159  | 0.179   | 0.0474     | 0.1095        | 1.189 | 494.5      | 0.0136              | 0.485 |
| 34  | 105 | 0.0468 | 0.0146  | 0.302   | 0.0774     | 0.0842        | 1.060 | 450.9      | 0.0223              | 0.500 |
| 35  | 96  | 0.0489 | 0.0136  | 0.277   | 0.0778     | 0.0919        | 1.030 | 401.8      | 0.0226              | 0.487 |
| 36  | 151 | 0.0521 | 0.0129  | 0.289   | 0.0792     | 0.0939        | 1.052 | 437.9      | 0.0236              | 0.472 |
| 37  | 131 | 0.0558 | 0.0146  | 0.327   | 0.1015     | 0.0908        | 1.117 | 433.4      | 0.0295              | 0.473 |
| 38  | 120 | 0.0601 | 0.0122  | 0.345   | 0.0911     | 0.1046        | 1.030 | 475.1      | 0.0282              | 0.463 |
| 39  | 128 | 0.0639 | 0.0118  | 0.185   | 0.0630     | 0.1573        | 1.084 | 481.7      | 0.0181              | 0.480 |
| 40  | 102 | 0.0679 | 0.0129  | 0.265   | 0.1124     | 0.1117        | 1.100 | 401.5      | 0.0340              | 0.467 |
| 41  | 100 | 0.0723 | 0.0139  | 0.245   | 0.1144     | 0.1185        | 1.094 | 370.1      | 0.0360              | 0.453 |
| 42  | 96  | 0.0773 | 0.0131  | 0.232   | 0.1176     | 0.1309        | 1.091 | 434.7      | 0.0365              | 0.470 |
| 43  | 115 | 0.0839 | 0.0136  | 0.252   | 0.1404     | 0.1189        | 1.126 | 416.7      | 0.0457              | 0.464 |
| 44  | 98  | 0.0914 | 0.0129  | 0.331   | 0.1519     | 0.1190        | 1.170 | 370.1      | 0.0519              | 0.466 |
| 45  | 100 | 0.0988 | 0.0121  | 0.219   | 0.1336     | 0.1658        | 1.148 | 341.0      | 0.0442              | 0.443 |
| 46  | 103 | 0.1080 | 0.0122  | 0.249   | 0.1786     | 0.1468        | 1.104 | 379.8      | 0.0589              | 0.437 |
| 47  | 103 | 0.1202 | 0.0128  | 0.210   | 0.1855     | 0.1715        | 1.173 | 408.6      | 0.0626              | 0.444 |
| 48  | 102 | 0.1343 | 0.0108  | 0.199   | 0.2106     | 0.1774        | 1.169 | 397.5      | 0.0727              | 0.417 |
| 49  | 93  | 0.1511 | 0.0114  | 0.201   | 0.2363     | 0.2027        | 1.229 | 443.4      | 0.0808              | 0.419 |
| 50  | 86  | 0.1828 | 0.0114  | 0.176   | 0.2566     | 0.2330        | 1.150 | 363.5      | 0.0952              | 0.403 |

**Table S2B. Population genomic statistics for NS sites for each bin of  $K_A$  values for *mel***

| Bin | $N$ | $K_A$   | $\pi_S$ | $\beta$ | $\omega_a$ | $\omega_{na}$ | Rec.  | CDS length | $\alpha \times K_A$ | $F_{op}$ |
|-----|-----|---------|---------|---------|------------|---------------|-------|------------|---------------------|----------|
| 1   | 96  | 0.00085 | 0.0157  | 0.577   | 0.0061     | 0.0109        | 1.139 | 678.3      | 0.00031             | 0.543    |
| 2   | 104 | 0.00105 | 0.0149  | 0.452   | 0.0027     | 0.0178        | 1.167 | 629.2      | 0.00014             | 0.545    |
| 3   | 128 | 0.00125 | 0.0156  | 0.470   | 0.0069     | 0.0165        | 1.142 | 611.0      | 0.00037             | 0.548    |
| 4   | 118 | 0.00145 | 0.0157  | 0.494   | 0.0125     | 0.0156        | 1.190 | 533.8      | 0.00065             | 0.556    |
| 5   | 139 | 0.00165 | 0.0148  | 0.448   | 0.0093     | 0.0224        | 1.166 | 590.0      | 0.00049             | 0.550    |
| 6   | 133 | 0.00185 | 0.0151  | 0.553   | 0.0160     | 0.0200        | 1.228 | 575.2      | 0.00084             | 0.543    |
| 7   | 131 | 0.00204 | 0.0140  | 0.458   | 0.0151     | 0.0244        | 1.100 | 627.1      | 0.00077             | 0.521    |
| 8   | 125 | 0.00224 | 0.0144  | 0.424   | 0.0162     | 0.0267        | 1.189 | 552.7      | 0.00082             | 0.534    |
| 9   | 122 | 0.00245 | 0.0150  | 0.469   | 0.0203     | 0.0278        | 1.082 | 612.2      | 0.00104             | 0.530    |
| 10  | 121 | 0.00264 | 0.0169  | 0.496   | 0.0245     | 0.0246        | 1.231 | 576.3      | 0.00132             | 0.534    |
| 11  | 122 | 0.00285 | 0.0147  | 0.431   | 0.0242     | 0.0282        | 1.085 | 625.1      | 0.00131             | 0.536    |
| 12  | 142 | 0.00305 | 0.0141  | 0.367   | 0.0237     | 0.0358        | 1.150 | 662.1      | 0.00120             | 0.529    |
| 13  | 112 | 0.00326 | 0.0147  | 0.532   | 0.0341     | 0.0274        | 1.175 | 536.1      | 0.00181             | 0.527    |
| 14  | 125 | 0.00345 | 0.0147  | 0.394   | 0.0237     | 0.0423        | 1.268 | 557.9      | 0.00126             | 0.526    |
| 15  | 130 | 0.00366 | 0.0145  | 0.393   | 0.0294     | 0.0376        | 1.172 | 535.2      | 0.00160             | 0.521    |
| 16  | 108 | 0.00385 | 0.0149  | 0.483   | 0.0418     | 0.0313        | 1.142 | 527.3      | 0.00218             | 0.527    |
| 17  | 107 | 0.00405 | 0.0150  | 0.403   | 0.0407     | 0.0382        | 1.252 | 564.1      | 0.00208             | 0.529    |
| 18  | 104 | 0.00425 | 0.0147  | 0.445   | 0.0346     | 0.0391        | 1.128 | 505.5      | 0.00197             | 0.530    |
| 19  | 101 | 0.00445 | 0.0138  | 0.384   | 0.0422     | 0.0428        | 1.068 | 560.1      | 0.00221             | 0.527    |
| 20  | 105 | 0.00465 | 0.0165  | 0.384   | 0.0397     | 0.0432        | 1.221 | 652.2      | 0.00221             | 0.515    |
| 21  | 106 | 0.00485 | 0.0136  | 0.343   | 0.0360     | 0.0536        | 1.086 | 588.4      | 0.00195             | 0.527    |
| 22  | 97  | 0.00504 | 0.0137  | 0.367   | 0.0518     | 0.0469        | 1.139 | 549.7      | 0.00266             | 0.521    |
| 23  | 97  | 0.00524 | 0.0131  | 0.476   | 0.0542     | 0.0454        | 1.037 | 631.7      | 0.00281             | 0.516    |
| 24  | 75  | 0.00544 | 0.0157  | 0.430   | 0.0522     | 0.0465        | 1.158 | 530.6      | 0.00288             | 0.513    |
| 25  | 111 | 0.00570 | 0.0136  | 0.318   | 0.0425     | 0.0608        | 1.148 | 505.7      | 0.00233             | 0.505    |
| 26  | 116 | 0.00600 | 0.0144  | 0.335   | 0.0545     | 0.0605        | 1.122 | 571.2      | 0.00281             | 0.502    |
| 27  | 122 | 0.00630 | 0.0136  | 0.362   | 0.0544     | 0.0598        | 1.167 | 555.0      | 0.00291             | 0.510    |
| 28  | 106 | 0.00659 | 0.0145  | 0.266   | 0.0316     | 0.0843        | 1.132 | 511.4      | 0.00178             | 0.506    |
| 29  | 105 | 0.00690 | 0.0130  | 0.331   | 0.0582     | 0.0716        | 1.006 | 572.0      | 0.00304             | 0.496    |
| 30  | 97  | 0.00721 | 0.0139  | 0.318   | 0.0519     | 0.0777        | 1.120 | 481.9      | 0.00289             | 0.516    |
| 31  | 107 | 0.00750 | 0.0129  | 0.255   | 0.0513     | 0.0873        | 1.069 | 600.1      | 0.00272             | 0.490    |
| 32  | 94  | 0.00779 | 0.0142  | 0.374   | 0.0711     | 0.0684        | 1.172 | 475.3      | 0.00396             | 0.500    |
| 33  | 100 | 0.00812 | 0.0128  | 0.259   | 0.0604     | 0.0853        | 1.091 | 433.1      | 0.00334             | 0.512    |
| 34  | 99  | 0.00856 | 0.0123  | 0.391   | 0.0789     | 0.0718        | 1.181 | 509.1      | 0.00439             | 0.500    |
| 35  | 117 | 0.00895 | 0.0128  | 0.371   | 0.0856     | 0.0817        | 1.102 | 552.4      | 0.00445             | 0.486    |
| 36  | 91  | 0.00938 | 0.0132  | 0.201   | 0.0636     | 0.1161        | 0.961 | 582.6      | 0.00332             | 0.495    |
| 37  | 104 | 0.00989 | 0.0132  | 0.275   | 0.0853     | 0.0932        | 1.126 | 488.1      | 0.00456             | 0.487    |
| 38  | 95  | 0.01038 | 0.0123  | 0.259   | 0.0816     | 0.1024        | 1.104 | 468.5      | 0.00456             | 0.484    |
| 39  | 103 | 0.01094 | 0.0126  | 0.291   | 0.1005     | 0.0969        | 1.083 | 401.2      | 0.00552             | 0.484    |
| 40  | 95  | 0.01155 | 0.0136  | 0.262   | 0.0994     | 0.1074        | 1.015 | 440.8      | 0.00554             | 0.484    |
| 41  | 95  | 0.01226 | 0.0129  | 0.334   | 0.1073     | 0.1047        | 1.118 | 426.1      | 0.00617             | 0.477    |
| 42  | 110 | 0.01293 | 0.0115  | 0.265   | 0.1261     | 0.1103        | 1.088 | 429.6      | 0.00687             | 0.462    |
| 43  | 99  | 0.01378 | 0.0141  | 0.249   | 0.1124     | 0.1208        | 1.065 | 358.0      | 0.00667             | 0.480    |
| 44  | 95  | 0.01469 | 0.0126  | 0.281   | 0.1417     | 0.1228        | 1.176 | 414.4      | 0.00790             | 0.478    |
| 45  | 101 | 0.01577 | 0.0125  | 0.182   | 0.1034     | 0.1626        | 1.127 | 373.8      | 0.00598             | 0.454    |
| 46  | 93  | 0.01694 | 0.0124  | 0.233   | 0.1290     | 0.1567        | 1.121 | 473.8      | 0.00760             | 0.433    |
| 47  | 107 | 0.01845 | 0.0127  | 0.323   | 0.1910     | 0.1452        | 1.186 | 374.4      | 0.01047             | 0.445    |
| 48  | 96  | 0.02065 | 0.0120  | 0.246   | 0.1674     | 0.1886        | 1.165 | 343.0      | 0.00975             | 0.451    |
| 49  | 90  | 0.02324 | 0.0118  | 0.164   | 0.2136     | 0.1794        | 1.153 | 424.2      | 0.01239             | 0.428    |
| 50  | 101 | 0.02712 | 0.0104  | 0.206   | 0.2795     | 0.2198        | 1.155 | 507.9      | 0.01501             | 0.424    |

$N$ : number of genes in the bin;  $K_A$ : mean nonsynonymous divergence for genes in the bin from the *mel-yak* or *mel* data;  $\pi_S$ , mean synonymous diversity;  $\beta$ , shape parameter of the distribution of fitness effects (DFE);  $\omega_a$ , the rate of adaptive substitutions for nonsynonymous mutations relative to the neutral rate;  $\omega_{na}$ , the rate of non-adaptive substitutions (neutral or slightly deleterious) relative to the neutral rate; Rec., mean smoothed effective crossing over rates from fits of Loess regressions to the crossing over rates along each chromosome (measured in cM per Mb) in *D. melanogaster*; CDS length, coding sequence length in number of aminoacids;  $\alpha \times K_A$ : the mean proportion of adaptive substitutions multiplied by non-synonymous divergence; *Fop*: mean codon usage bias, measured as the frequency of optimal codons. See the first section of the Materials and Methods for further details of the sources of these data.

Table S3A. UTR population genomic statistics for each bin of  $K_A$  values for *mel-yak*

| Bin | 5' UTR |        |        |        |         |          | 3' UTR |        |        |        |         |          |
|-----|--------|--------|--------|--------|---------|----------|--------|--------|--------|--------|---------|----------|
|     | $N$    | $K_A$  | $K_U$  | length | $\beta$ | $\alpha$ | $N$    | $K_A$  | $K_U$  | length | $\beta$ | $\alpha$ |
| 1   | 102    | 0.0019 | 0.0830 | 263    | 0.469   | 0.662    | 102    | 0.0019 | 0.0602 | 518    | 0.506   | 0.649    |
| 2   | 163    | 0.0031 | 0.0852 | 230    | 0.394   | 0.646    | 166    | 0.0031 | 0.0723 | 39     | 0.366   | 0.591    |
| 3   | 150    | 0.0044 | 0.0888 | 257    | 0.270   | 0.484    | 153    | 0.0044 | 0.0679 | 424    | 0.357   | 0.502    |
| 4   | 177    | 0.0056 | 0.0904 | 245    | 0.421   | 0.665    | 178    | 0.0056 | 0.0778 | 395    | 0.349   | 0.619    |
| 5   | 167    | 0.0069 | 0.0892 | 252    | 0.402   | 0.626    | 171    | 0.0068 | 0.0709 | 435    | 0.460   | 0.656    |
| 6   | 181    | 0.0081 | 0.0846 | 262    | 0.422   | 0.575    | 186    | 0.0081 | 0.0782 | 354    | 0.367   | 0.576    |
| 7   | 158    | 0.0093 | 0.0930 | 225    | 0.344   | 0.575    | 161    | 0.0093 | 0.0829 | 383    | 0.304   | 0.495    |
| 8   | 183    | 0.0106 | 0.1067 | 224    | 0.394   | 0.603    | 184    | 0.0106 | 0.0872 | 347    | 0.306   | 0.553    |
| 9   | 158    | 0.0119 | 0.0938 | 238    | 0.344   | 0.589    | 163    | 0.0119 | 0.0838 | 319    | 0.307   | 0.538    |
| 10  | 189    | 0.0131 | 0.0945 | 215    | 0.395   | 0.650    | 185    | 0.0131 | 0.0806 | 346    | 0.371   | 0.615    |
| 11  | 158    | 0.0144 | 0.0932 | 216    | 0.390   | 0.586    | 160    | 0.0144 | 0.0862 | 309    | 0.346   | 0.566    |
| 12  | 170    | 0.0156 | 0.0907 | 227    | 0.276   | 0.466    | 174    | 0.0156 | 0.0838 | 328    | 0.290   | 0.529    |
| 13  | 133    | 0.0169 | 0.0944 | 228    | 0.383   | 0.628    | 130    | 0.0169 | 0.0932 | 320    | 0.275   | 0.534    |
| 14  | 152    | 0.0181 | 0.0923 | 204    | 0.394   | 0.554    | 157    | 0.0180 | 0.0962 | 305    | 0.271   | 0.496    |
| 15  | 133    | 0.0193 | 0.0919 | 201    | 0.437   | 0.620    | 132    | 0.0193 | 0.1095 | 251    | 0.495   | 0.648    |
| 16  | 150    | 0.0205 | 0.1003 | 200    | 0.347   | 0.528    | 149    | 0.0205 | 0.0996 | 279    | 0.295   | 0.470    |
| 17  | 125    | 0.0219 | 0.1037 | 229    | 0.285   | 0.552    | 131    | 0.0219 | 0.0895 | 340    | 0.338   | 0.501    |
| 18  | 121    | 0.0231 | 0.1116 | 225    | 0.248   | 0.460    | 126    | 0.0231 | 0.1011 | 295    | 0.248   | 0.466    |
| 19  | 115    | 0.0243 | 0.0984 | 177    | 0.168   | 0.317    | 111    | 0.0243 | 0.1143 | 226    | 0.401   | 0.655    |
| 20  | 118    | 0.0256 | 0.1053 | 161    | 0.370   | 0.574    | 115    | 0.0256 | 0.1192 | 230    | 0.350   | 0.555    |
| 21  | 107    | 0.0268 | 0.1095 | 231    | 0.319   | 0.575    | 112    | 0.0268 | 0.1025 | 293    | 0.333   | 0.628    |
| 22  | 105    | 0.0282 | 0.1017 | 199    | 0.357   | 0.575    | 107    | 0.0282 | 0.1129 | 244    | 0.404   | 0.506    |
| 23  | 83     | 0.0293 | 0.0991 | 186    | 0.358   | 0.478    | 85     | 0.0293 | 0.1175 | 233    | 0.206   | 0.411    |
| 24  | 98     | 0.0306 | 0.1074 | 171    | 0.261   | 0.438    | 103    | 0.0305 | 0.1140 | 261    | 0.597   | 0.679    |
| 25  | 73     | 0.0318 | 0.1022 | 186    | 0.408   | 0.585    | 72     | 0.0318 | 0.1233 | 230    | 0.436   | 0.656    |
| 26  | 74     | 0.0331 | 0.1214 | 206    | 0.333   | 0.488    | 77     | 0.0331 | 0.1182 | 240    | 0.171   | 0.421    |
| 27  | 64     | 0.0344 | 0.1072 | 131    | 0.289   | 0.469    | 59     | 0.0344 | 0.1133 | 204    | 0.303   | 0.576    |
| 28  | 50     | 0.0354 | 0.0992 | 186    | 0.398   | 0.490    | 49     | 0.0354 | 0.1156 | 259    | 0.259   | 0.580    |
| 29  | 100    | 0.0369 | 0.1073 | 144    | 0.360   | 0.556    | 100    | 0.0369 | 0.1114 | 198    | 0.216   | 0.473    |
| 30  | 93     | 0.0389 | 0.1218 | 166    | 0.434   | 0.713    | 100    | 0.0389 | 0.1239 | 258    | 0.357   | 0.585    |
| 31  | 97     | 0.0409 | 0.1152 | 148    | 0.714   | 0.761    | 98     | 0.0409 | 0.1154 | 204    | 0.436   | 0.586    |
| 32  | 91     | 0.0429 | 0.1147 | 165    | 0.376   | 0.578    | 88     | 0.0429 | 0.1357 | 226    | 0.306   | 0.562    |
| 33  | 80     | 0.0449 | 0.1129 | 110    | 0.147   | 0.401    | 84     | 0.0449 | 0.1153 | 166    | 0.369   | 0.634    |
| 34  | 82     | 0.0469 | 0.1124 | 148    | 0.767   | 0.787    | 83     | 0.0469 | 0.1279 | 189    | 0.394   | 0.605    |
| 35  | 73     | 0.0489 | 0.1026 | 134    | 0.370   | 0.560    | 73     | 0.0489 | 0.1308 | 238    | 0.215   | 0.344    |
| 36  | 110    | 0.0520 | 0.1245 | 118    | 0.185   | 0.281    | 113    | 0.0520 | 0.1311 | 162    | 0.140   | 0.263    |
| 37  | 95     | 0.0558 | 0.1082 | 128    | 0.245   | 0.432    | 98     | 0.0558 | 0.1363 | 204    | 0.222   | 0.413    |
| 38  | 86     | 0.0601 | 0.1168 | 88     | 2.277   | 0.871    | 83     | 0.0601 | 0.1350 | 164    | 0.218   | 0.478    |
| 39  | 104    | 0.0639 | 0.1125 | 136    | 0.463   | 0.583    | 102    | 0.0639 | 0.1417 | 267    | 0.550   | 0.610    |
| 40  | 75     | 0.0679 | 0.1139 | 81     | 0.260   | 0.364    | 69     | 0.0680 | 0.1454 | 130    | 0.445   | 0.689    |
| 41  | 71     | 0.0723 | 0.1460 | 107    | 0.190   | 0.521    | 74     | 0.0724 | 0.1470 | 147    | 0.255   | 0.464    |
| 42  | 68     | 0.0772 | 0.1319 | 135    | 0.168   | 0.247    | 69     | 0.0772 | 0.1680 | 170    | 0.143   | 0.370    |
| 43  | 78     | 0.0841 | 0.1261 | 125    | 1.298   | 0.821    | 79     | 0.0840 | 0.1404 | 182    | 0.277   | 0.580    |
| 44  | 68     | 0.0914 | 0.1269 | 98     | 0.152   | 0.385    | 65     | 0.0914 | 0.1828 | 167    | 0.411   | 0.707    |
| 45  | 69     | 0.0988 | 0.1116 | 97     | 0.179   | 0.175    | 65     | 0.0990 | 0.1414 | 155    | 0.262   | 0.489    |
| 46  | 72     | 0.1079 | 0.1387 | 141    | 0.249   | 0.454    | 72     | 0.1081 | 0.1509 | 211    | 0.050   | 0.240    |
| 47  | 62     | 0.1202 | 0.1204 | 110    | 0.142   | 0.342    | 56     | 0.1200 | 0.1648 | 184    | 0.819   | 0.751    |
| 48  | 65     | 0.1347 | 0.1474 | 107    | 0.127   | 0.387    | 63     | 0.1348 | 0.1638 | 183    | 0.248   | 0.542    |
| 49  | 57     | 0.1509 | 0.1436 | 83     | 0.447   | 0.500    | 53     | 0.1505 | 0.1670 | 154    | 0.374   | 0.447    |
| 50  | 33     | 0.1833 | 0.1422 | 116    | 0.799   | 0.613    | 34     | 0.1826 | 0.1554 | 142    | 0.259   | 0.196    |

**Table S3B. UTR Population genomic statistics for each bin of  $K_A$  values for *mel***

| Bin | 5' UTR |        |        |        |         |          | 3' UTR |        |        |        |         |          |
|-----|--------|--------|--------|--------|---------|----------|--------|--------|--------|--------|---------|----------|
|     | $N$    | $K_A$  | $K_U$  | length | $\beta$ | $\alpha$ | $N$    | $K_A$  | $K_U$  | length | $\beta$ | $\alpha$ |
| 1   | 93     | 0.0008 | 0.0199 | 274    | 0.513   | 0.686    | 94     | 0.0009 | 0.0148 | 408    | 0.475   | 0.607    |
| 2   | 92     | 0.0011 | 0.0192 | 289    | 0.402   | 0.535    | 96     | 0.0011 | 0.0172 | 412    | 0.256   | 0.400    |
| 3   | 120    | 0.0013 | 0.0180 | 245    | 0.408   | 0.625    | 122    | 0.0013 | 0.0186 | 399    | 0.419   | 0.645    |
| 4   | 107    | 0.0015 | 0.0199 | 253    | 0.334   | 0.606    | 111    | 0.0015 | 0.0172 | 334    | 0.339   | 0.626    |
| 5   | 126    | 0.0016 | 0.0177 | 214    | 0.280   | 0.460    | 129    | 0.0016 | 0.0167 | 380    | 0.383   | 0.622    |
| 6   | 126    | 0.0018 | 0.0166 | 248    | 0.312   | 0.479    | 122    | 0.0018 | 0.0188 | 341    | 0.280   | 0.541    |
| 7   | 121    | 0.0020 | 0.0168 | 249    | 0.419   | 0.553    | 121    | 0.0020 | 0.0156 | 362    | 0.351   | 0.523    |
| 8   | 112    | 0.0022 | 0.0196 | 250    | 0.390   | 0.540    | 115    | 0.0022 | 0.0196 | 340    | 0.365   | 0.603    |
| 9   | 115    | 0.0024 | 0.0187 | 233    | 0.394   | 0.628    | 114    | 0.0024 | 0.0208 | 339    | 0.282   | 0.586    |
| 10  | 114    | 0.0026 | 0.0186 | 250    | 0.561   | 0.737    | 117    | 0.0026 | 0.0197 | 328    | 0.388   | 0.637    |
| 11  | 110    | 0.0029 | 0.0204 | 229    | 0.269   | 0.511    | 112    | 0.0029 | 0.0187 | 303    | 0.239   | 0.494    |
| 12  | 129    | 0.0030 | 0.0181 | 198    | 0.344   | 0.518    | 131    | 0.0030 | 0.0199 | 361    | 0.353   | 0.658    |
| 13  | 105    | 0.0033 | 0.0180 | 212    | 0.384   | 0.581    | 104    | 0.0033 | 0.0207 | 385    | 0.327   | 0.546    |
| 14  | 112    | 0.0035 | 0.0200 | 212    | 0.471   | 0.650    | 113    | 0.0035 | 0.0169 | 293    | 0.450   | 0.589    |
| 15  | 116    | 0.0037 | 0.0182 | 211    | 0.311   | 0.466    | 114    | 0.0037 | 0.0217 | 316    | 0.263   | 0.482    |
| 16  | 100    | 0.0038 | 0.0254 | 239    | 0.147   | 0.398    | 99     | 0.0038 | 0.0176 | 346    | 0.291   | 0.433    |
| 17  | 94     | 0.0041 | 0.0178 | 198    | 0.528   | 0.655    | 96     | 0.0041 | 0.0180 | 282    | 0.405   | 0.674    |
| 18  | 93     | 0.0043 | 0.0203 | 178    | 0.478   | 0.526    | 92     | 0.0043 | 0.0212 | 321    | 0.378   | 0.491    |
| 19  | 96     | 0.0045 | 0.0228 | 219    | 0.305   | 0.531    | 94     | 0.0045 | 0.0198 | 336    | 0.349   | 0.584    |
| 20  | 94     | 0.0046 | 0.0224 | 169    | 0.289   | 0.488    | 93     | 0.0046 | 0.0198 | 271    | 0.348   | 0.561    |
| 21  | 94     | 0.0049 | 0.0204 | 223    | 0.434   | 0.579    | 94     | 0.0049 | 0.0207 | 277    | 0.292   | 0.517    |
| 22  | 89     | 0.0050 | 0.0177 | 174    | 0.226   | 0.385    | 94     | 0.0050 | 0.0214 | 230    | 0.367   | 0.595    |
| 23  | 86     | 0.0052 | 0.0220 | 195    | 1.244   | 0.806    | 86     | 0.0052 | 0.0215 | 294    | 0.360   | 0.583    |
| 24  | 61     | 0.0054 | 0.0177 | 149    | 0.556   | 0.614    | 61     | 0.0054 | 0.0231 | 230    | 0.336   | 0.608    |
| 25  | 104    | 0.0057 | 0.0224 | 172    | 0.463   | 0.658    | 105    | 0.0057 | 0.0232 | 220    | 0.381   | 0.607    |
| 26  | 101    | 0.0060 | 0.0218 | 170    | 0.321   | 0.596    | 105    | 0.0060 | 0.0182 | 243    | 0.643   | 0.655    |
| 27  | 106    | 0.0063 | 0.0209 | 201    | 0.544   | 0.709    | 109    | 0.0063 | 0.0220 | 276    | 0.398   | 0.529    |
| 28  | 87     | 0.0066 | 0.0228 | 162    | 0.236   | 0.388    | 91     | 0.0066 | 0.0222 | 226    | 0.295   | 0.524    |
| 29  | 91     | 0.0069 | 0.0197 | 156    | 0.498   | 0.581    | 88     | 0.0069 | 0.0339 | 291    | 0.275   | 0.526    |
| 30  | 85     | 0.0072 | 0.0238 | 183    | 0.268   | 0.574    | 86     | 0.0072 | 0.0235 | 209    | 0.263   | 0.494    |
| 31  | 93     | 0.0075 | 0.0222 | 186    | 0.195   | 0.433    | 91     | 0.0075 | 0.0231 | 224    | 0.342   | 0.635    |
| 32  | 80     | 0.0078 | 0.0206 | 174    | 0.318   | 0.537    | 82     | 0.0078 | 0.0231 | 216    | 0.233   | 0.454    |
| 33  | 90     | 0.0081 | 0.0225 | 178    | 0.229   | 0.446    | 89     | 0.0081 | 0.0209 | 180    | 0.198   | 0.471    |
| 34  | 90     | 0.0086 | 0.0243 | 144    | 0.272   | 0.485    | 89     | 0.0086 | 0.0252 | 245    | 0.360   | 0.546    |
| 35  | 101    | 0.0090 | 0.0219 | 128    | 0.452   | 0.613    | 99     | 0.0090 | 0.0220 | 171    | 0.774   | 0.708    |
| 36  | 78     | 0.0094 | 0.0182 | 131    | 0.263   | 0.414    | 78     | 0.0094 | 0.0208 | 203    | 0.246   | 0.497    |
| 37  | 92     | 0.0099 | 0.0201 | 151    | 0.362   | 0.563    | 86     | 0.0099 | 0.0283 | 185    | 0.446   | 0.655    |
| 38  | 84     | 0.0104 | 0.0248 | 151    | 0.152   | 0.379    | 77     | 0.0104 | 0.0222 | 244    | 0.199   | 0.415    |
| 39  | 85     | 0.0109 | 0.0219 | 142    | 0.475   | 0.668    | 89     | 0.0109 | 0.0279 | 149    | 0.277   | 0.627    |
| 40  | 80     | 0.0116 | 0.0207 | 121    | 1.140   | 0.780    | 78     | 0.0116 | 0.0216 | 168    | 0.486   | 0.569    |
| 41  | 76     | 0.0123 | 0.0240 | 71     | 0.273   | 0.484    | 77     | 0.0123 | 0.0208 | 191    | 0.406   | 0.636    |
| 42  | 88     | 0.0129 | 0.0224 | 109    | 0.159   | 0.237    | 86     | 0.0129 | 0.0238 | 143    | 0.261   | 0.506    |
| 43  | 71     | 0.0138 | 0.0251 | 84     | 0.246   | 0.555    | 71     | 0.0138 | 0.0289 | 156    | 0.289   | 0.544    |
| 44  | 74     | 0.0147 | 0.0249 | 138    | 0.149   | 0.374    | 75     | 0.0147 | 0.0307 | 168    | 0.435   | 0.656    |
| 45  | 76     | 0.0158 | 0.0193 | 85     | 0.396   | 0.654    | 72     | 0.0157 | 0.0262 | 128    | 0.259   | 0.519    |
| 46  | 68     | 0.0170 | 0.0297 | 105    | 0.423   | 0.663    | 69     | 0.0169 | 0.0312 | 192    | 0.074   | 0.346    |
| 47  | 75     | 0.0184 | 0.0312 | 86     | 1.436   | 0.862    | 72     | 0.0184 | 0.0254 | 160    | 0.349   | 0.643    |
| 48  | 71     | 0.0207 | 0.0184 | 77     | 3.791   | 0.841    | 67     | 0.0206 | 0.0273 | 152    | 0.418   | 0.671    |
| 49  | 60     | 0.0233 | 0.0255 | 123    | 0.164   | 0.517    | 52     | 0.0234 | 0.0227 | 197    | 0.197   | 0.385    |
| 50  | 67     | 0.0270 | 0.0263 | 112    | 0.348   | 0.543    | 66     | 0.0269 | 0.0297 | 144    | 0.781   | 0.581    |

$N$ : number of genes in the bin;  $K_A$ : mean nonsynonymous divergence for the genes in the bin for the *mel-yak* or *mel* data;  $K_U$ : mean UTR divergence; length: UTR length in bp;  $\beta$ , shape parameter of the distribution of fitness effects (DFE);  $\alpha$ , proportion of adaptive substitutions. See the first section of the Materials and Methods for further details of the sources of these data.

**Table S4 Effects of exon length on BGS effects**

| $\omega_{na}$                    | Exon length |            |            |
|----------------------------------|-------------|------------|------------|
|                                  | Short       | Standard   | Long       |
| <b>Low gene conversion rate</b>  |             |            |            |
| 0.025                            | 1.04; 3.56  | 1.65; 3.55 | 2.53; 3.87 |
| 0.050                            | 2.06; 4.58  | 3.25; 5.16 | 4.92; 6.26 |
| 0.075                            | 3.01; 5.53  | 4.74; 6.64 | 7.11; 8.45 |
| 0.100                            | 3.86; 6.38  | 6.02; 7.92 | 8.96; 10.3 |
| 0.125                            | 4.57; 7.10  | 7.11; 9.02 | 10.4; 11.8 |
| 0.150                            | 5.18; 7.71  | 7.95; 9.86 | 11.5; 12.9 |
| <b>High gene conversion rate</b> |             |            |            |
| 0.025                            | 0.62; 1.71  | 0.97; 1.83 | 1.49; 2.14 |
| 0.050                            | 1.22; 2.31  | 1.89; 2.75 | 2.88; 3.52 |
| 0.075                            | 1.75; 2.84  | 2.69; 3.54 | 4.05; 4.70 |
| 0.100                            | 2.21; 3.30  | 3.36; 4.22 | 4.97; 5.61 |
| 0.125                            | 2.57; 3.66  | 3.86; 4.71 | 5.61; 6.25 |
| 0.150                            | 2.85; 3.94  | 4.20; 5.06 | 5.99; 6.64 |

The entries in each cell are the mean  $E$  values (as percentages), obtained using the summation method. The left-hand entries are the effects of NS sites alone; the right-hand entries are the net effects of NS and UTR sites. Four 100bp introns are present. The short, standard and long exons have 50, 100 and 200 codons, respectively. The mutation rate per bp is  $4.5 \times 10^{-9}$  and the rate of crossing over per bp is  $1 \times 10^{-8}$ . The low rates of gene conversion have  $g_c = 1.0 \times 10^{-8}$  and  $d_g = 440$ ; the high rates have  $g_c = 5.0 \times 10^{-8}$  and  $d_g = 500$ . The shape parameter of the gamma distribution of fitness effects is 0.3.

**Table S5. Tests of the linearity of the effect of gene length on BGS strength**

| $\omega_{na}$                    | Predicted  | Observed   |
|----------------------------------|------------|------------|
| <b>Low gene conversion rate</b>  |            |            |
| 0.025                            | 4.10; 4.10 | 3.66; 4.21 |
| 0.050                            | 5.16; 5.80 | 5.33; 5.98 |
| 0.075                            | 6.64; 7.37 | 6.87; 7.61 |
| 0.100                            | 7.92; 8.76 | 8.20; 9.04 |
| 0.125                            | 9.02; 9.94 | 9.31; 10.2 |
| 0.150                            | 9.86; 10.9 | 10.2; 11.2 |
| <b>High gene conversion rate</b> |            |            |
| 0.025                            | 1.83; 1.98 | 1.89; 2.06 |
| 0.050                            | 2.75; 2.90 | 2.86; 3.04 |
| 0.075                            | 3.54; 3.71 | 3.69; 3.89 |
| 0.100                            | 4.22; 4.38 | 4.38; 4.57 |
| 0.125                            | 4.71; 4.89 | 4.87; 5.08 |
| 0.150                            | 5.06; 5.24 | 5.21; 5.42 |

The columns labelled 'Predicted' are the values for genes with five 300bp exons; the 'Observed' are the (unweighted) means over genes with 150, 300 and 600bp exons. The left-hand entries were obtained using the summation method with 5 exons separated by 100bp introns; the right-hand entries were obtained from the integral approximation with the mixed model of gene conversion. The other parameters are as in Table S3.



**Table S6 Effects of intron length on BGS effects**

| $\omega_{na}$                    | Intron length |            |            |            |
|----------------------------------|---------------|------------|------------|------------|
|                                  | None          | Short      | Standard   | Long       |
| <b>Low gene conversion rate</b>  |               |            |            |            |
| 0.025                            | 1.86; 3.93    | 1.75; 3.73 | 1.65; 3.55 | 1.55; 3.33 |
| 0.050                            | 3.65; 5.72    | 3.42; 5.40 | 3.25; 5.16 | 3.02; 4.80 |
| 0.075                            | 5.29; 7.37    | 4.99; 6.97 | 4.74; 6.64 | 4.39; 6.17 |
| 0.100                            | 6.76; 8.83    | 6.33; 8.31 | 6.02; 7.92 | 5.56; 7.34 |
| 0.125                            | 8.02; 10.1    | 7.50; 9.49 | 7.11; 9.02 | 6.56; 8.34 |
| 0.150                            | 9.03; 11.1    | 8.41; 10.4 | 7.95; 9.86 | 7.34; 9.12 |
| <b>High gene conversion rate</b> |               |            |            |            |
| 0.025                            | 1.07; 1.98    | 1.02; 1.90 | 0.97; 1.83 | 0.92; 1.73 |
| 0.050                            | 2.09; 3.00    | 1.96; 2.84 | 1.89; 2.75 | 1.77; 2.58 |
| 0.075                            | 2.98; 3.89    | 2.81; 3.69 | 2.69; 3.54 | 2.54; 3.35 |
| 0.100                            | 3.73; 4.64    | 3.51; 4.39 | 3.36; 4.22 | 3.15; 3.96 |
| 0.125                            | 4.30; 5.22    | 4.03; 4.91 | 3.86; 4.71 | 3.61; 4.42 |
| 0.150                            | 4.72; 5.64    | 4.40; 5.28 | 4.20; 5.06 | 3.93; 4.74 |

The entries in each cell are the mean  $E$  values (percentages) obtained by the summation method. The left-hand entries are the effects of NS sites alone; the right-hand entries are the net effects of NS and UTR sites.

The exon lengths are 100 codons when introns are present, and 500 codons in the absence of introns, so that the total exon length is fixed. The lengths of the short, standard and long introns are 50bp, 100bp and 200bp, respectively. The mutation rate per bp is  $4.5 \times 10^{-9}$  and the rate of crossing over per basepair is  $1 \times 10^{-8}$ . The low rates of gene conversion have  $g_c = 1.0 \times 10^{-8}$  and  $d_g = 350$ ; the high rates have  $g_c = 5.0 \times 10^{-8}$  and  $d_g = 500$ .

**Table S7. BGS effects for the *mel-yak* data with different mutation and recombination rates**

| Mutation rate                    | Crossing over rate |               |               |
|----------------------------------|--------------------|---------------|---------------|
|                                  | Low                | Standard      | High          |
| <b>Low gene conversion rate</b>  |                    |               |               |
| <b>Low</b>                       | 0.18 ± 0.03        | 0.16 ± 0.03   | 0.12 ± 0.02   |
| <b>Standard</b>                  | 0.27 ± 0.05        | 0.24 ± 0.04   | 0.18 ± 0.03   |
| <b>High</b>                      | 0.37 ± 0.06        | 0.31 ± 0.05   | 0.24 ± 0.04   |
| <b>High gene conversion rate</b> |                    |               |               |
| <b>Low</b>                       | 0.064 ± 0.015      | 0.062 ± 0.013 | 0.086 ± 0.018 |
| <b>Standard</b>                  | 0.096 ± 0.022      | 0.094 ± 0.021 | 0.057 ± 0.012 |
| <b>High</b>                      | 0.13 ± 0.03        | 0.12 ± 0.03   | 0.11 ± 0.02   |

The entries in each cell are the regression coefficients of mean  $E$  for a bin on  $K_A$ , with their standard errors. The low, standard and high rates of mutation per bp are  $3.0 \times 10^{-9}$ ,  $4.5 \times 10^{-9}$  and  $6.0 \times 10^{-9}$ , respectively. The low, standard and high rates of crossing over per bp are  $0.5 \times 10^{-8}$ ,  $1.0 \times 10^{-8}$  and  $2.0 \times 10^{-8}$ , respectively.

**Table S8. Effects of rates of mutation and crossing over on estimates of the parameters of positive selection and synonymous site diversity**

| Mutation rate                    | Crossover rate | $\gamma_a$ | $\rho_a$<br>( $\times 10^4$ ) | $\gamma_u$ | $\rho_u$<br>( $\times 10^4$ ) | $\pi_{r\ max}$ | $\pi_{r\ mean}$ | $r$   |
|----------------------------------|----------------|------------|-------------------------------|------------|-------------------------------|----------------|-----------------|-------|
| <b>Low gene conversion rate</b>  |                |            |                               |            |                               |                |                 |       |
| Low                              | Low            | 345        | 1.58                          | 151        | 12.3                          | 0.900          | 0.768           | 0.911 |
| Low                              | Standard       | 508        | 1.11                          | 135        | 14.3                          | 0.935          | 0.800           | 0.922 |
| Low                              | High           | 508        | 1.11                          | 119        | 1.61                          | 0.963          | 0.854           | 0.918 |
| Standard                         | Low            | 159        | 3.48                          | 135        | 14.2                          | 0.868          | 0.741           | 0.913 |
| Standard                         | Standard       | 249        | 2.21                          | 213        | 9.03                          | 0.882          | 0.757           | 0.924 |
| Standard                         | High           | 411        | 1.35                          | 41.2       | 46.6                          | 0.958          | 0.824           | 0.919 |
| High                             | Low            | 106        | 5.26                          | 151        | 12.3                          | 0.823          | 0.701           | 0.914 |
| High                             | Standard       | 159        | 3.46                          | 213        | 9.03                          | 0.850          | 0.727           | 0.925 |
| High                             | High           | 220        | 2.42                          | 88.1       | 20.2                          | 0.939          | 0.811           | 0.921 |
| <b>High gene conversion rate</b> |                |            |                               |            |                               |                |                 |       |
| Low                              | Low            | 508        | 1.11                          | 197        | 9.74                          | 0.967          | 0.877           | 0.899 |
| Low                              | Standard       | 508        | 1.11                          | 260        | 7.40                          | 0.967          | 0.885           | 0.915 |
| Low                              | High           | 508        | 1.11                          | 353        | 5.44                          | 0.969          | 0.856           | 0.920 |
| Standard                         | Low            | 508        | 1.11                          | 197        | 9.74                          | 0.951          | 0.829           | 0.902 |
| Standard                         | Standard       | 508        | 1.11                          | 229        | 8.41                          | 0.955          | 0.844           | 0.918 |
| Standard                         | High           | 508        | 1.11                          | 307        | 6.27                          | 0.958          | 0.863           | 0.920 |
| High                             | Low            | 468        | 1.23                          | 338        | 5.69                          | 0.907          | 0.775           | 0.908 |
| High                             | Standard       | 505        | 1.14                          | 370        | 5.21                          | 0.917          | 0.787           | 0.920 |
| High                             | High           | 508        | 1.11                          | 260        | 7.40                          | 0.950          | 0.832           | 0.920 |

The *mel-yak* data used for Figure 3 were analysed for different values of the mutation and crossing over rates, using the ‘standard’ gene model. The low and high rates of crossing over per bp were one-half and twice the standard value of  $1 \times 10^{-8}$ , respectively; the low and high mutation rates per bp were  $3 \times 10^{-9}$  and  $6 \times 10^{-9}$ , respectively, compared with the standard value of  $4.5 \times 10^{-9}$ .  $\pi_{r\ max}$  is the maximum value of the mean synonymous site diversity of a gene relative to its value in the absence of selection;  $\pi_{r\ mean}$  is the corresponding mean value over bins. Other variables are defined in the text.

**Table S9. Bootstrapped *mel* estimates of parameters of positive selection and synonymous site diversity**

| <b>Variable</b>          | <b>Zero GC</b>    | <b>Low GC</b>     | <b>High GC</b>    |
|--------------------------|-------------------|-------------------|-------------------|
| $r$                      | 0.64 (0.45, 0.77) | 0.65 (0.51, 0.76) | 0.66 (0.54, 0.78) |
| Intercept for $\gamma_a$ | 28 (10, 110)      | 78 (10, 177)      | 350 (110, 577)    |
| Slope for $\gamma_a$     | 82 (0, 167)       | 115 (0.0, 267)    | 198 (0.0, 600)    |
| Mean $\gamma_a$          | 52 (29, 110)      | 110 (45, 210)     | 406 (228, 610)    |
| $p_a$ ( $\times 10^4$ )  | 11 (4.9, 17)      | 5.1 (2.6, 1.0)    | 0.86 (0.60, 2.1)  |
| $\gamma_u$               | 123 (10, 510)     | 130 (10, 410)     | 305 (10, 610)     |
| $p_u$ ( $\times 10^4$ )  | 57 (3.3, 187)     | 34 (4.2, 187)     | 20 (1.0, 187)     |
| $\pi_r$ <i>max</i>       | 0.86 (0.75, 0.91) | 0.89 (0.80, 0.87) | 0.93 (0.89, 0.96) |
| $\pi_r$ <i>mean</i>      | 0.79 (0.70, 0.84) | 0.83 (0.75, 0.87) | 0.86 (0.81, 0.90) |

The data used for Figure S2 were analysed, with 250 independent bootstraps for each bin of  $K_A$  values, performed as described in the Materials and Methods. The entries show the means and (in brackets) the upper and lower 2.5 percentiles of the bootstrap distributions of the relevant parameter estimates.

## 8. SI Figures

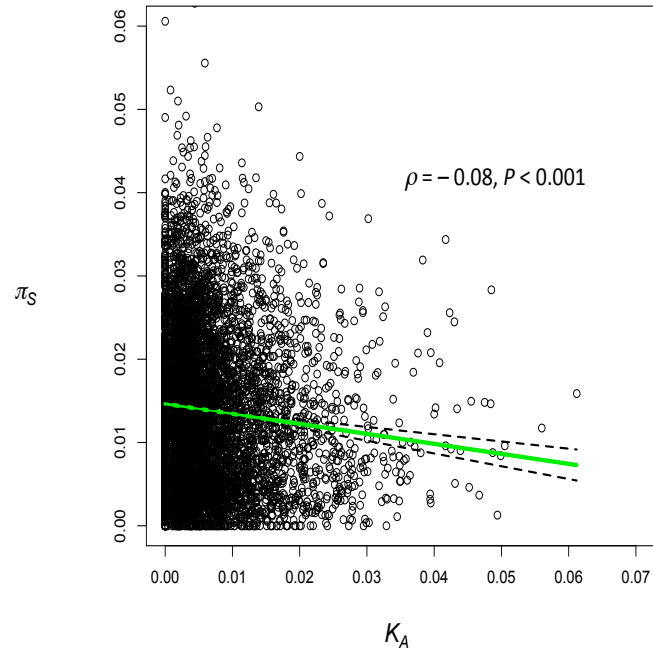

**Figure S1.** Synonymous site diversity ( $\pi_S$ ) for a gene plotted against the estimated number of NS substitutions per site along the *D. melanogaster* lineage since divergence from its common ancestor with *D. simulans*.  $\rho$  is the Spearman rank correlation coefficient. The green line is the least squares linear regression; the dashed black lines represent its 95% confidence interval.

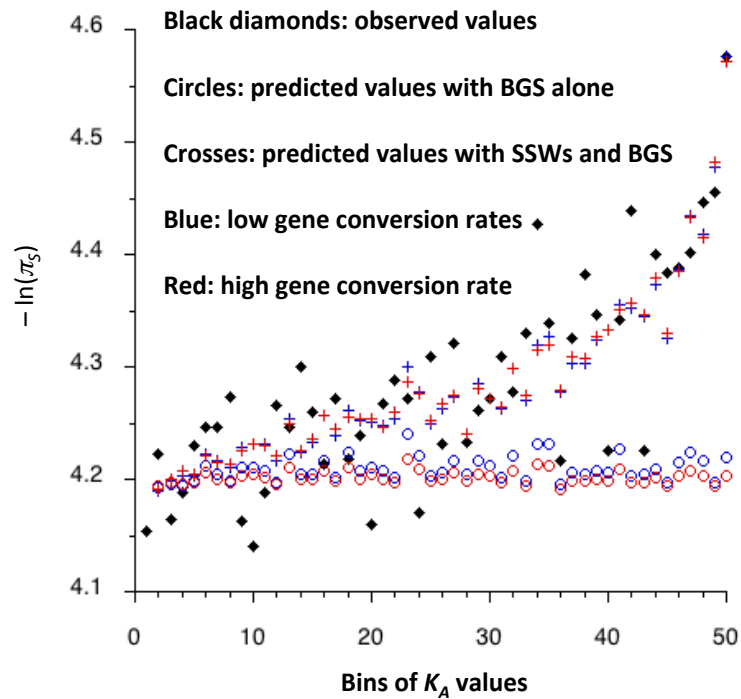

**Figure S2.** Plots of predicted and observed value of  $-\ln(\pi_S)$  for each bin of  $K_A$  values for the *meI* data.

The black diamonds are the observed values of  $-\ln(\pi_S)$  for each bin of  $K_A$  values for autosomes, corrected for the correlation between  $\pi_S$  and  $K_S$  as described in the first section of the Materials and Methods. The circles are the theoretical values of mean  $E$  for each bin, obtained by the integral model of BGS, assuming a single gene with 500 NS sites. The crosses are the predicted values of  $-\ln(\pi_S)$  for each bin, given by the combined BGS and SSW models at NS and UTR sites. Red and blue correspond to the low and high gene conversion rates used in Figure 2. The mutation rate and crossing over parameters are as in Figure 2, except that large effect mutations constitute 15% of all mutations, with a selection coefficient against heterozygotes of 0.044.

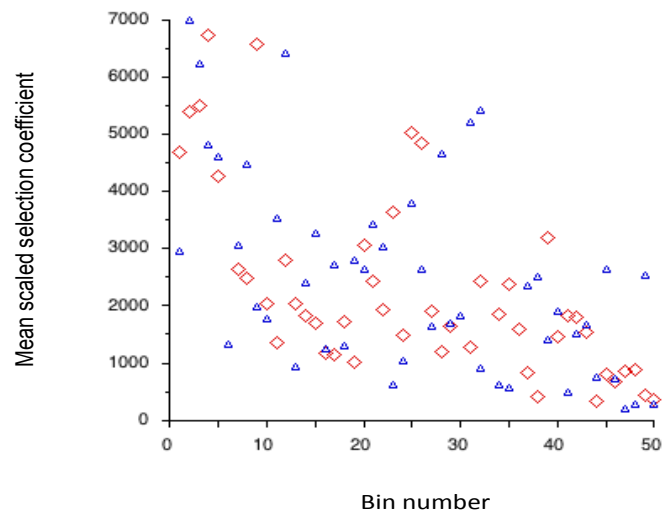

**Figure S3.** Mean scaled selection coefficients ( $\gamma$ ) for NS sites for each bin of  $K_A$  values; red diamonds are *mel-yak* data, and blue triangles are *mel* data. For clarity of display, some extreme outlier values for *mel-yak* are not shown: bin 5 ( $\gamma = 8.7 \times 10^3$ ), bin 30 ( $\gamma = 1.05 \times 10^4$ ), and bin 32 ( $\gamma = 3.04 \times 10^4$ ).

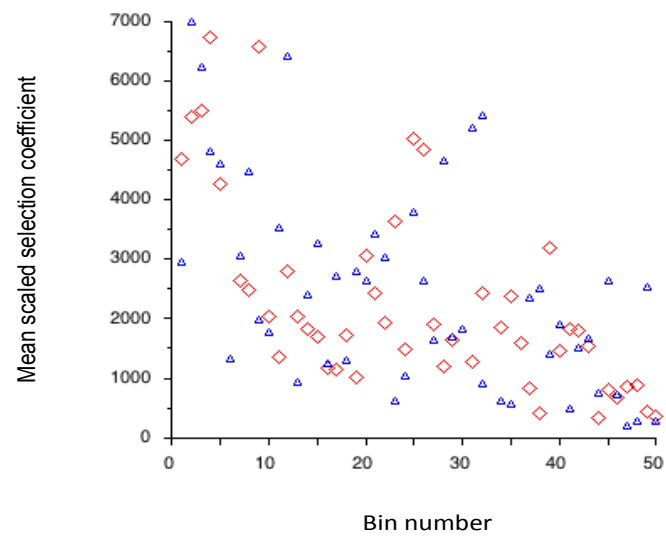

**Figure S4.** Mean scaled selection coefficients ( $\gamma$ ) for UTR sites for each bin of  $K_A$  values; red diamonds are *mel-yak* data, and blue triangles are *mel* data.



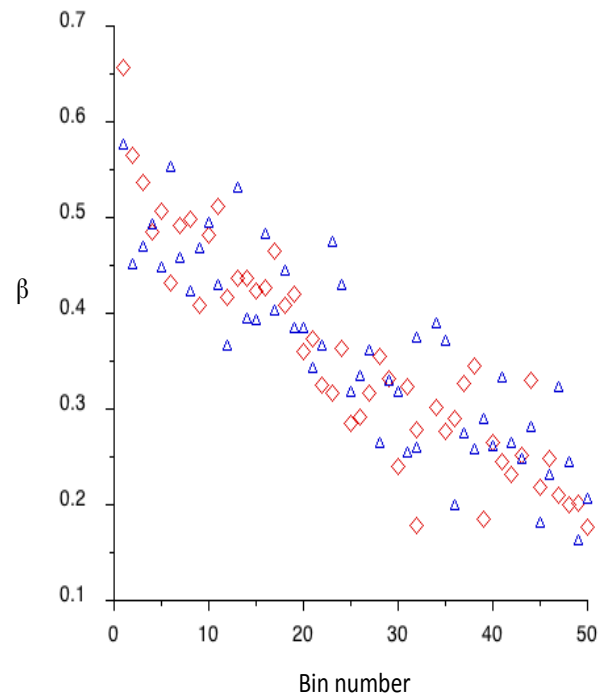

**Figure S5.** Shape parameters ( $\beta$ ) for NS sites for each bin of  $K_A$  values; red diamonds are *mel-yak* data, and blue triangles are *mel* data.

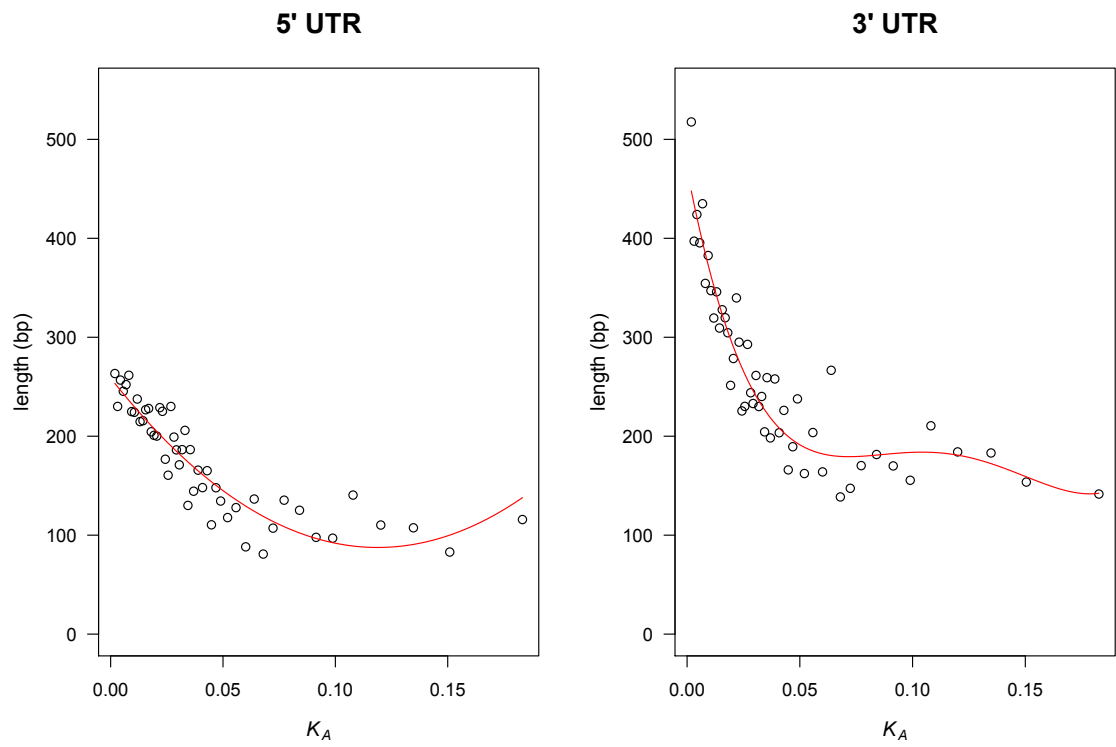

**Figure S6.** Plots of the lengths of the UTRs against  $K_A$  for the binned *mel-yak* data. The red curves are the quadratic least-squares fit for the 5'UTRs, and the quartic least-squares fit for the 3'UTRs.

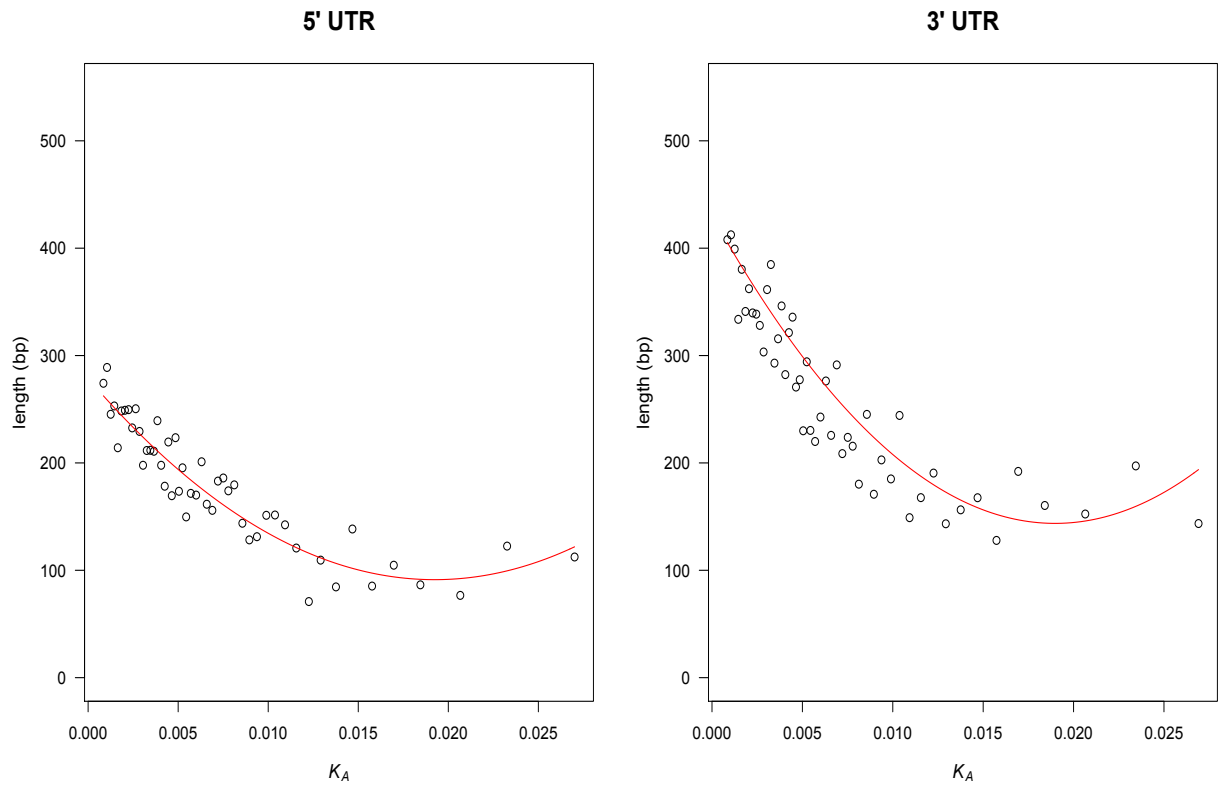

**Figure S7.** Plots of the lengths of the UTRs against  $K_A$  for the binned *mel* data. The red curves are the quadratic least-squares fit for the 5'UTRs and 3'UTRs.

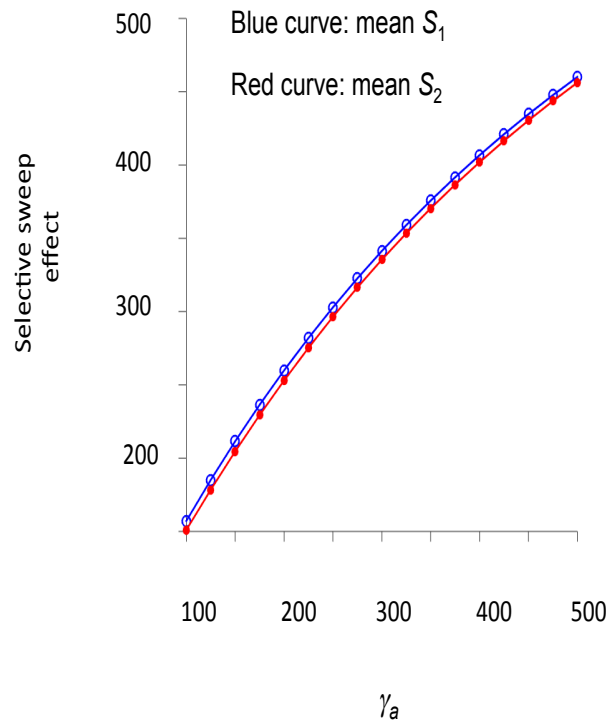

**Figure S8.** Plots of the mean over all synonymous sites in a gene of the predicted effects of a single selective sweep at each NS site on synonymous site diversity as a function of the scaled selection coefficient  $\gamma_a$ , given by the summation term in Eq. S24.  $S_1$  is the exact result for the sum, and  $S_2$  is the approximation with  $S_i = 1$  used in the data analyses.  $N_e = 10^6$ ; the recombination parameters are  $r_c = g_c = 10^{-8}$ , and  $d_g = 440$ ; there are 5 exons of 300 bp, separated by 4 introns of 100bp (the standard gene model).
